# Supplementary material
Source: Royal Society of Chemistry journal article supplement (doi:10.1039/d6gc00973e)
Supplement: d6gc00973e1.pdf [file d6gc00973e1.pdf]

Supporting Information

**Interfacial Ozone Chemistry Enables Aromatic Oxidation in  
Microdroplets**

Lian Xue<sup>†</sup>, Boyu Zhu<sup>†</sup>, Peng Zheng, Xinyao Li, Kaiyu Geng,<sup>\*</sup> Jiao Geng,<sup>\*</sup> Xingbang Hu,<sup>\*</sup>

<sup>1</sup> State Key Laboratory of Coordination Chemistry, School of Chemistry and Chemical Engineering, Nanjing University, Nanjing 210093, PR China

<sup>\*</sup>Corresponding author E-mail: kaiyugeng@nju.edu.cn; gengjiao@nju.edu.cn; huxb@nju.edu.cn

<sup>†</sup>Lian Xue and Boyu Zhu share the first authorship.

## List of Contents

1. Chemicals
2. General procedures
3. Measure the size of microdroplets
4. Product detection
5. O<sub>3</sub> Detection Method
6. Radical Detection
7. Calculation methods
8. **Fig. S1** (a) Liquid mixtures used for microdroplets reaction and (b) Ultrasonic atomization device for synthesizing dimethyl phthalate microdroplets.
9. **Fig. S2** <sup>13</sup>C NMR spectrum of naphthalene.
10. **Fig. S3** <sup>13</sup>C NMR spectrum of dimethyl phthalate.
11. **Fig. S4** <sup>13</sup>C NMR spectra of naphthalene oxidation to dimethyl phthalate in cyclic microdroplets reaction.
12. **Fig. S5** <sup>1</sup>H NMR spectrum of naphthalene.
13. **Fig. S6** <sup>1</sup>H NMR spectrum of dimethyl phthalate.
14. **Fig. S7** <sup>1</sup>H NMR spectra of naphthalene oxidation to dimethyl phthalate in cyclic microdroplets reaction.
15. **Fig. S8** High resolution mass spectrometry image of microdroplet reaction after spraying NaI/H<sub>2</sub>O solution.
16. **Fig. S9** High resolution mass spectrometry of IDS before and after oxidation reaction in microdroplets.
17. **Fig. S10** UV visible absorption spectra of (a) IDS-O<sub>3</sub>, (b) IDS-O<sub>2</sub> and (c) IDS-H<sub>2</sub>O<sub>2</sub> at different reaction times.  $\Delta h$  represents the absorbance change at 610 nm, defined as  $\Delta h = A_t - A_0$ , t (t = 0.1, 0.25 h, 0.5 h, 0.75 h, 1 h, 1.25 h, 4 h, 8 h, 10 h), A<sub>0</sub> is the absorbance at 0 h.
18. **Fig. S11** Radical quenching experiments using tert-butanol (TBA) and TEMPO.
19. **Fig. S12** Ultrasonic + non spray, non ultrasonic + spray and ultrasonic + spray were used for the microdroplets reaction of naphthalene oxidation to dimethyl phthalate in air atmosphere.
20. **Fig. S13** (a) Gas chromatogram and (b) mass spectrum of spontaneous oxidation of naphthalene droplets in an inverted device.
21. **Fig. S14** High resolution mass spectrometry of glyoxal and oxalic acid.
22. **Fig. S15** High resolution mass spectrometry of DMPO capturing ·CH<sub>3</sub> before and after microdroplet reaction.
23. **Fig. S16** EPR spectrum of pure CH<sub>3</sub>OH-DMPO.
24. **Fig. S17** The calibration curves of dimethyl phthalate with 5 concentrations (2 mM, 4 mM, 6 mM, 8 mM, and 10 mM) using a gas chromatography.
25. **Fig. S18** (a) GC-MS chromatogram of microdroplet control experiment of pure water and (b) water-methanol mixed solution.
26. **Fig. S19** The optimized structures of transition states
27. **Fig. S20** The optimized structures without microdroplets.
28. **Fig. S21** The optimized structures in microdroplets.
29. **Fig. S22** Total Energy along IRC path: TS7 and TS8 without microdroplets (a) and (b); in microdroplets (c) and (d).
30. **Table S1** A series of microdroplet reactions of naphthalene oxidation carried out under different conditions.
31. **Table S2** The energy consumptions and E-factor for the microdroplet spraying process used in naphthalene oxidation.

32. **Table S3.** A series of microdroplet reactions of naphthalene oxidation carried out under different conditions.
33. **References**

## 1. Chemicals

Naphthalene (NA) and methanol (CH<sub>3</sub>OH, AR) were obtained from Nanjing Juyou Scientific Equipment Co., Ltd., dimethyl phthalate (DP), phosphoric acid (H<sub>3</sub>PO<sub>4</sub>) and ethyl acetate (EA) were purchased from Nanjing Shoude Biotechnology Co., Ltd., 5-dimethyl-1-pyrroline N-oxide (97%, DMPO) was purchased from Meili (Shanghai) Chemical Technology Co., Ltd., and indigo disulfonate sodium (IDS) was purchased from Nanjing Wanqing Glass Instrument Co., Ltd. Disodium hydrogen phosphate (Na<sub>2</sub>HPO<sub>4</sub>), Tert-butanol (TBA), 2,2,6,6-tetramethylpiperidin-1-oxyl (TEMPO) and Sodium Iodide (NaI) were purchased from Shanghai Bide Pharmaceutical Technology Co., Ltd. Deionized water is provided by Milli-Q from Nanjing University. All chemicals are used as is without further purification.

## 2. General procedures

Droplets are generated by atomizers (ultrasonic power). Firstly, dissolve naphthalene in a 1:5.5 methanol water mixed solution to form a homogeneous solution. Then, inject the solution into the reactor equipped with an atomizer, ensuring that the atomizer is completely submerged in the solution. At room temperature and in an air atmosphere, droplets are sprayed from bottom to top and then fall back to the surface of the solution under the action of gravity, forming a cycle. This process lasts for 4 hours to prepare dimethyl phthalate.

To comprehensively explore the factors influencing the reaction, a series of microdroplet experiments were conducted under different conditions. To assess the roles of O<sub>2</sub> and H<sub>2</sub>O<sub>2</sub>, reactions were performed using N<sub>2</sub>, O<sub>2</sub>, and H<sub>2</sub>O<sub>2</sub> as comparative systems, with the N<sub>2</sub> + H<sub>2</sub>O<sub>2</sub> setup specifically designed to eliminate the possible interference of O<sub>3</sub>, which could form O<sub>2</sub> via microdroplet reactions in an air atmosphere. To further exclude the contribution of H<sub>2</sub>O<sub>2</sub>, a control experiment with catalase was performed to specifically decompose H<sub>2</sub>O<sub>2</sub>. To distinguish ozone-driven chemistry from general reactive oxygen species (ROS)-mediated oxidation, radical quenching experiments were performed using tert-butanol (TBA, a selective hydroxyl radical scavenger) and 2,2,6,6-tetramethylpiperidin-1-oxyl (TEMPO, a broad-spectrum radical scavenger). To compare the E-factor and energy input with the catalytic aerobic oxidation method, we conducted oxidation experiments using an ozone generator.

Additionally, the impact of temperature was examined by varying it across 30 °C, 40 °C, 50 °C, and 60 °C. The effect of atomization power was evaluated by adjusting it to 10W, 20W, and 30W. Furthermore, to determine the influence of ultrasound, three different conditions were compared: ultrasound + non-spray, non-ultrasound + spray, and ultrasound + spray. To enhance the reliability of the results, all experiments were conducted in triplicate.

### 3. Measure the size of microdroplets

We used a high-speed camera equipped with a high-magnification lens (Phato, USA) to capture the microdroplets (Fig. 1a). Since the high-speed camera could not clearly capture the microdroplets in a single frame, we attempted to observe and measure them using a microscope. Specifically, the microdroplets floating in the air were encapsulated in an immiscible oil phase, and the system was then observed under the microscope (Fig. 1b).

### 4. Product detection

Product analysis was performed using a Shimadzu GC-MS-QP2202NX. The concentration of DP was determined using a Shimadzu GC-2014C gas chromatograph. NMR spectra were recorded using a Bruker DPX 400 MHz spectrometer with DMSO- $d_6$  as the solvent. The structures of NA and DP were determined by  $^1\text{H}$  and  $^{13}\text{C}$  NMR. Isopropanol was used as the internal standard, and the yield of DP was calculated based on  $^1\text{H}$  NMR (Fig. S7).

### 5. $\text{O}_3$ Detection Method

Ozone ( $\text{O}_3$ ) reacts rapidly with indigo disulfonate sodium (IDS), causing decolorization under acidic conditions. The absorbance change at 610 nm is linearly correlated with  $\text{O}_3$  concentration, making it suitable for rapid detection. In contrast, hydrogen peroxide ( $\text{H}_2\text{O}_2$ ) can also induce IDS decolorization, but at a much slower rate. If measurements are conducted within 6h of reagent addition,  $\text{H}_2\text{O}_2$  interference can be neglected.<sup>[1]</sup>

When applied to the microdroplet system under an  $\text{O}_2$  atmosphere, ultraviolet-visible spectroscopy (UV-Vis) show that the characteristic absorption peak of IDS at 610 nm decreases rapidly with reaction time,<sup>[1-2]</sup> with noticeable decolorization occurring within about 1.25 hours, turning the solution from deep blue to almost colorless (**Fig. 4a**).<sup>[3]</sup> In contrast, under the same concentration of  $\text{H}_2\text{O}_2$ , even when the reaction time is extended to 10 hours, the change in absorption intensity is minimal, with almost no noticeable decolorization. Although hydrogen peroxide ( $\text{H}_2\text{O}_2$ ) can also induce the decolorization of IDS under specific conditions, its reaction rate is much slower than that of  $\text{O}_3$ . Previous literature reports that during the first 6 hours after reagent addition, the influence of  $\text{H}_2\text{O}_2$  is negligible,<sup>[1]</sup> ensuring that the observed decolorization phenomenon is primarily attributed to the oxidation by  $\text{O}_3$ .

To further verify the presence of ozone, sodium iodide (NaI) was used as an additional probe. The strong oxidant generated in microdroplets oxidized I<sup>-</sup> to IO<sub>3</sub><sup>-</sup> ( $m/z = 174.88$ ), indicating the formation of a highly active interfacial oxidant capable of multielectron oxidation, which is consistent with typical ozone-mediated chemistry.<sup>[2]</sup> This method is well-supported by recent studies demonstrating that NaI can be selectively oxidized to IO<sub>x</sub><sup>-</sup> species by ozone generated in charged water microdroplets.<sup>[4]</sup>

In this experiment, IDS was first added in a phosphoric acid-disodium hydrogen phosphate (H<sub>3</sub>PO<sub>4</sub>-Na<sub>2</sub>HPO<sub>4</sub>) solution. The prepared solution was then introduced into the reaction chamber and subjected to ultrasonic nebulization for approximately 1h in a recirculating spray system. Subsequently, UV-Vis spectroscopy (Shimadzu UV-2600i) and electrospray ionization mass spectrometry (ESI-MS, Thermo Fisher) were performed, with all analyses completed within 2h. UV-Vis spectroscopy showed a significant decrease in absorbance at 610 nm, accompanied by a color change from blue to colorless, confirming the in-situ generation of O<sub>3</sub> in microdroplets. Additionally, ESI-MS detected a oxidation product of IDS by O<sub>3</sub> at  $m/z = 226.0$  (Fig. 4c), further providing evidence of O<sub>3</sub> presence.

Notably, we also directly captured the primary ozonide (POZ) intermediate of naphthalene ozonolysis by high-resolution mass spectrometry. The observation of this short-lived intermediate provides direct mechanistic evidence for the reaction between naphthalene and in-situ generated ozone, consistent with the well-established ozonolysis pathway in microdroplet systems.<sup>[5]</sup>

## 6. Radical Detection

The methyl radical ( $\bullet\text{CH}_3$ ) was trapped by DMPO and detected using a Bruker A300 electron spin resonance (EPR) spectrometer and Thermo Fisher electrospray ionization mass spectrometry (ESI-MS).

## 7. Calculation methods

The Density Function Theory (DFT) calculations were conducted using the Gaussian16 and Gaussian09 software package employing the B3LYP hybrid functional for electron exchange and correlation with Empirical Dispersion = GD3BJ keyword, and utilizing the 6-311+G(d, p) basis set for all atoms [abbr: B3LYP/6-311+G(d, p)]. The impact of an oriented external electric field (OEEF) was initially investigated in Gaussian 16, defining the EEF axis, direction, and magnitude with the “Field = M  $\pm$  N” keyword. Energy calculations and Zero-point energy (ZPE) correction have been done by using the same level of theory.<sup>[2, 4]</sup>

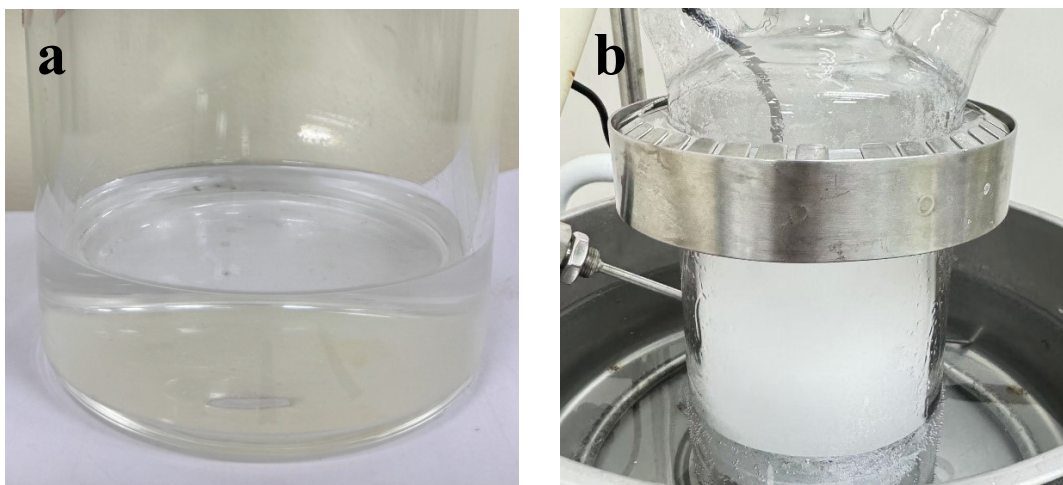

**Fig. S1** (a) Liquid mixtures used for microdroplets reaction and (b) Ultrasonic atomization device for synthesizing dimethyl phthalate microdroplets.

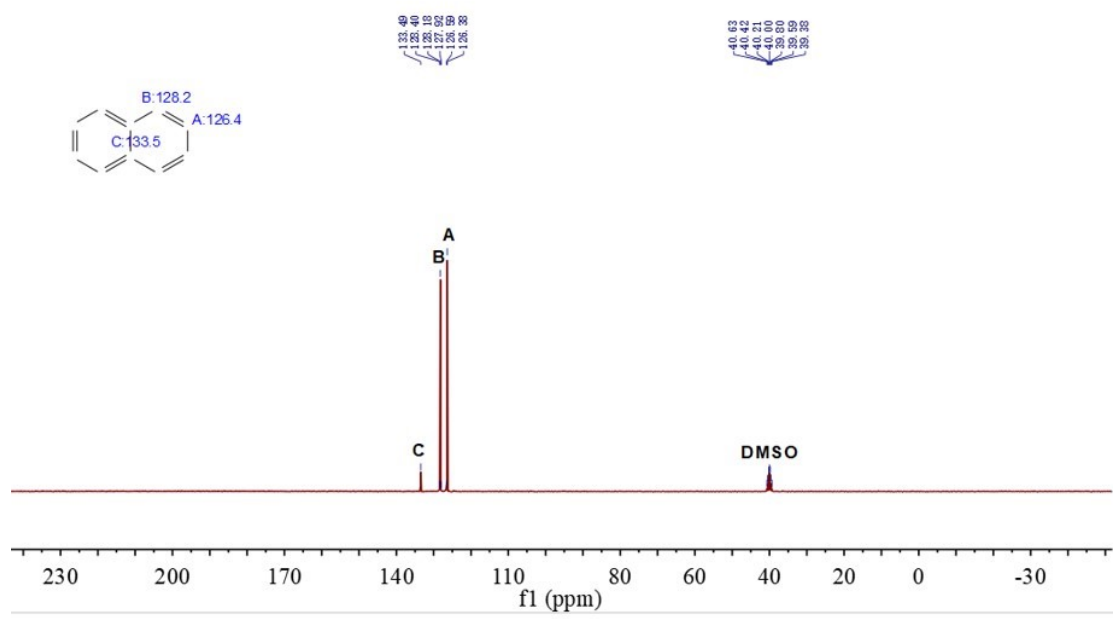

**Fig. S2** <sup>13</sup>C NMR spectrum of naphthalene.

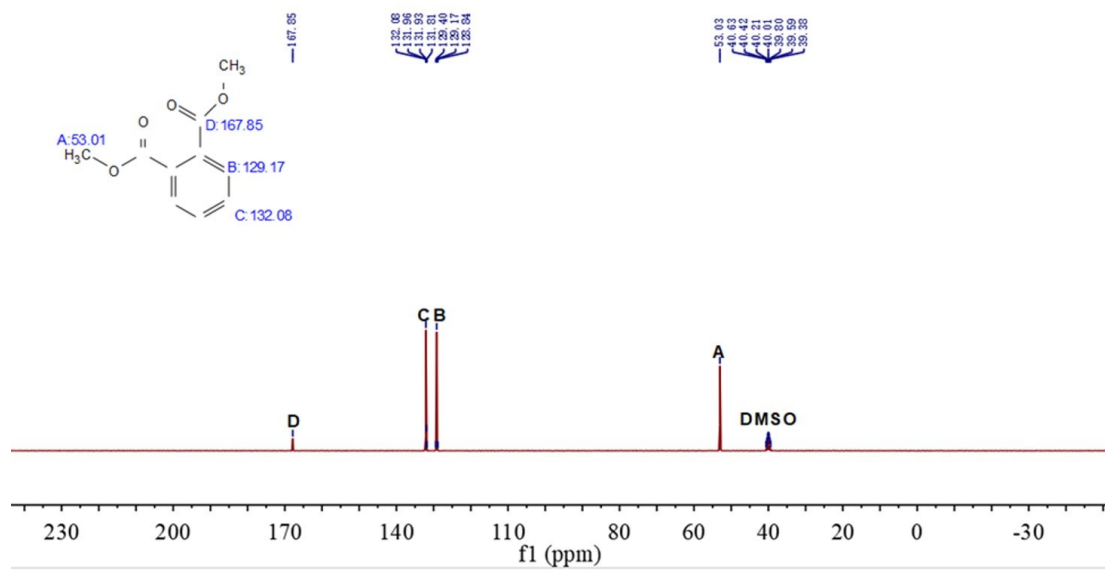

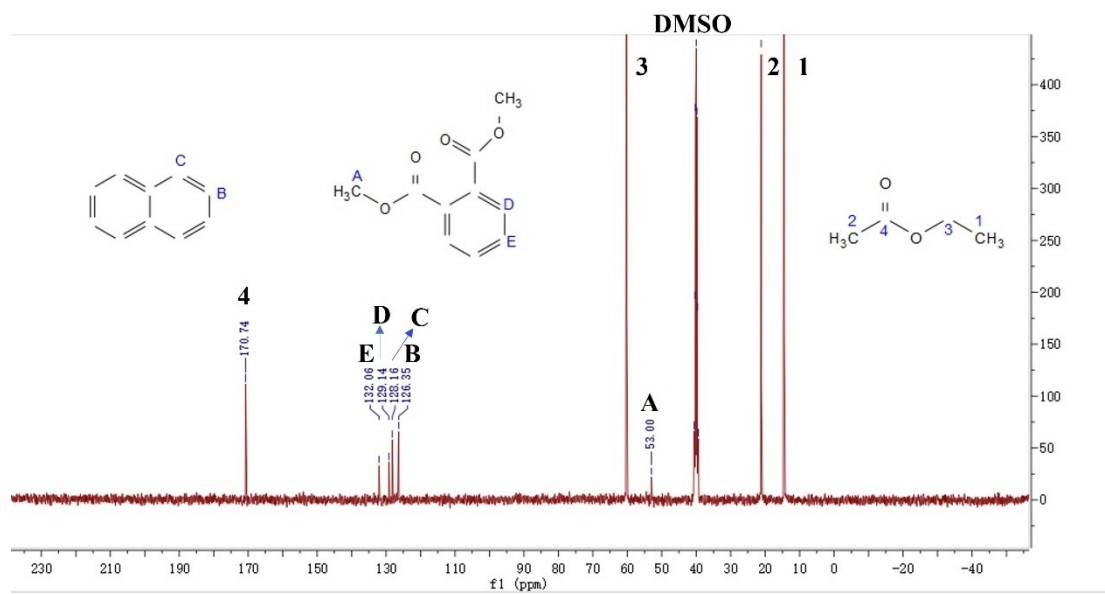

**Fig. S4**  $^{13}\text{C}$  NMR spectra of naphthalene oxidation to dimethyl phthalate in cyclic microdroplets reaction.

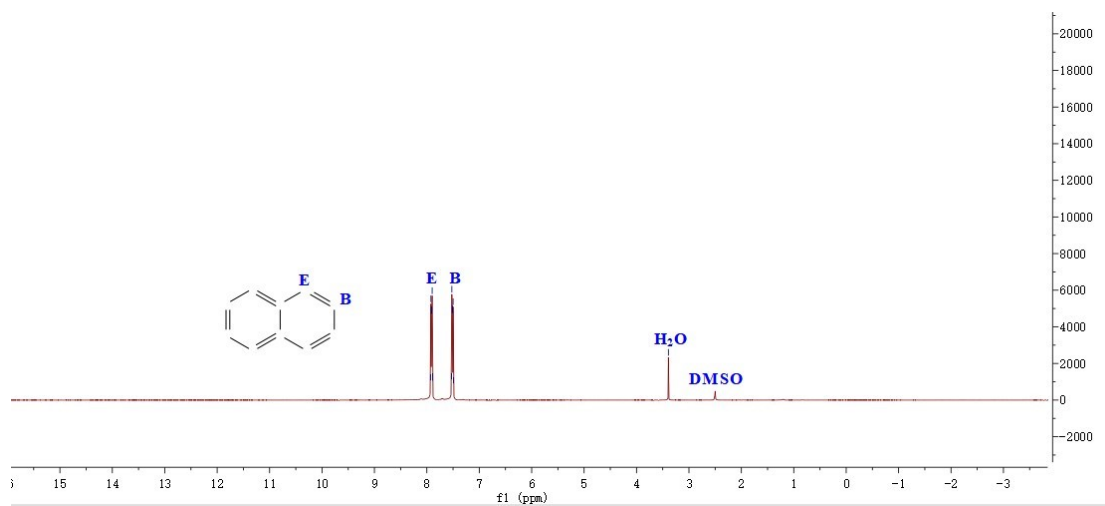

**Fig. S5**  $^1\text{H}$  NMR spectrum of naphthalene.

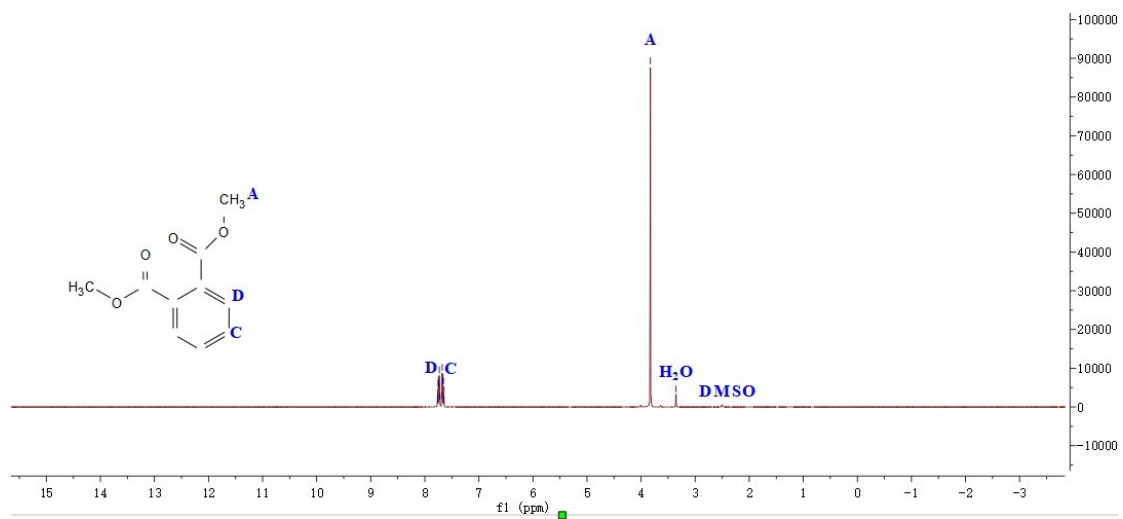

**Fig. S6**  $^1\text{H}$  NMR spectrum of dimethyl phthalate.

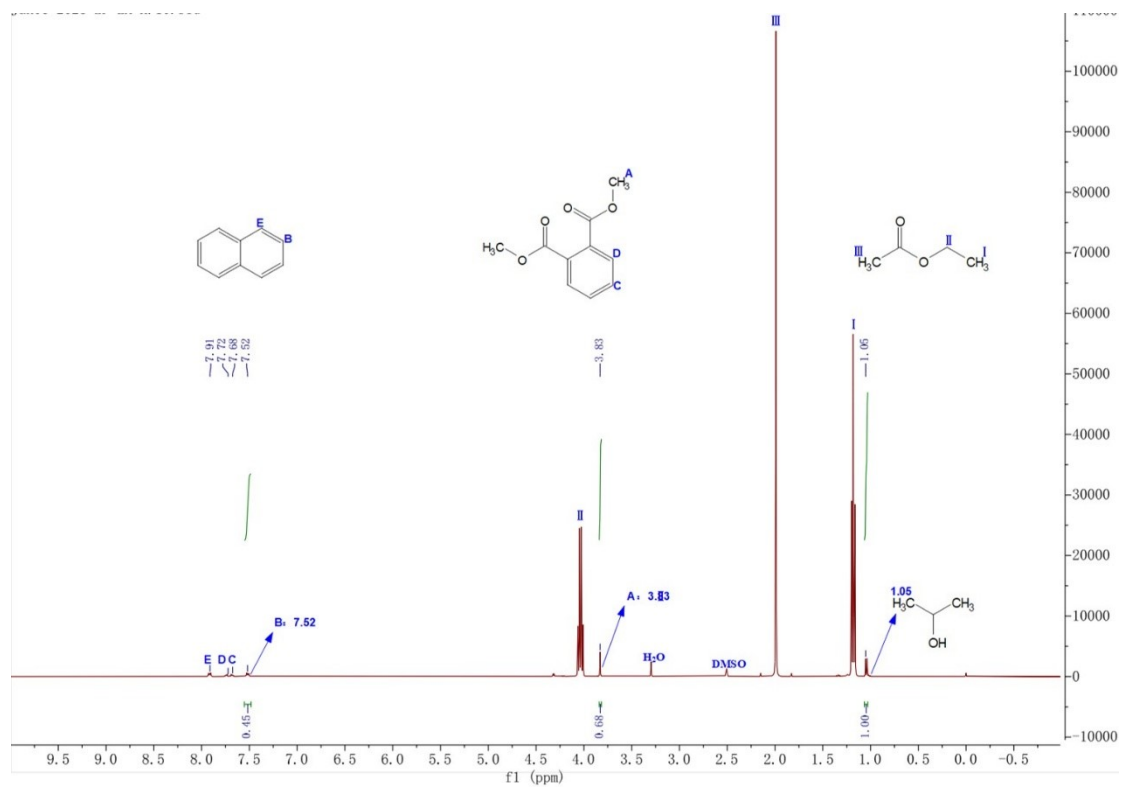

**Fig. S7**  $^1\text{H}$  NMR spectra of naphthalene oxidation to dimethyl phthalate in cyclic microdroplets reaction.

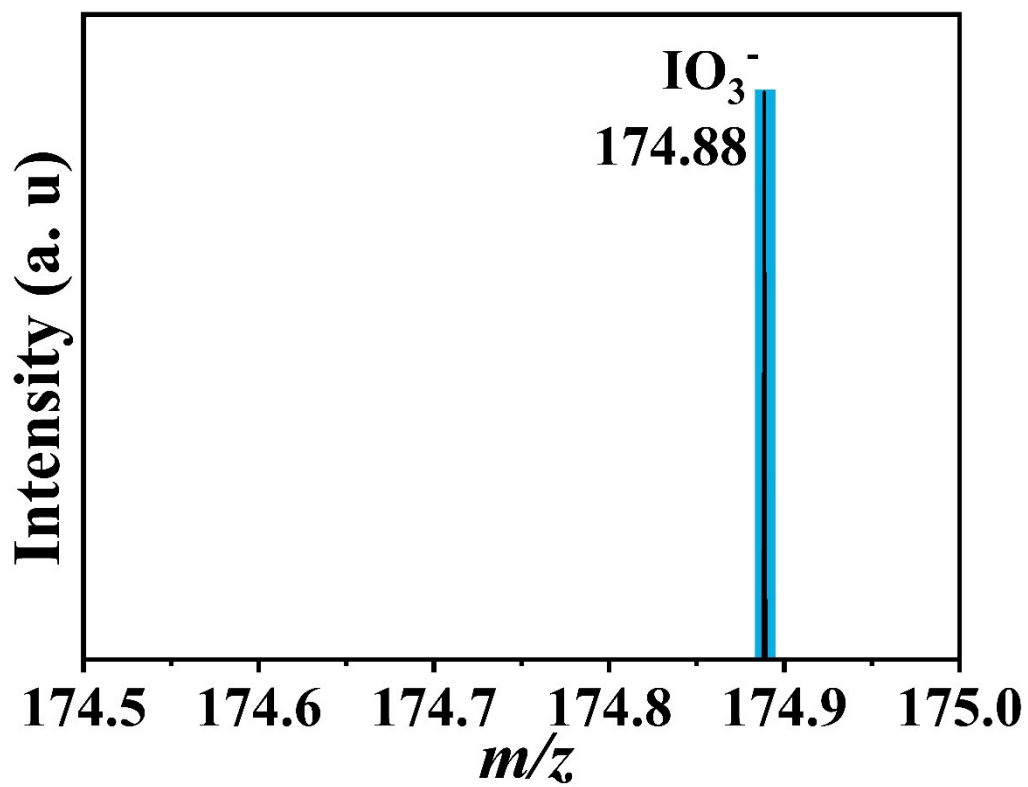

**Fig. S8** High resolution mass spectrometry image of microdroplet reaction after spraying NaI/H<sub>2</sub>O solution.

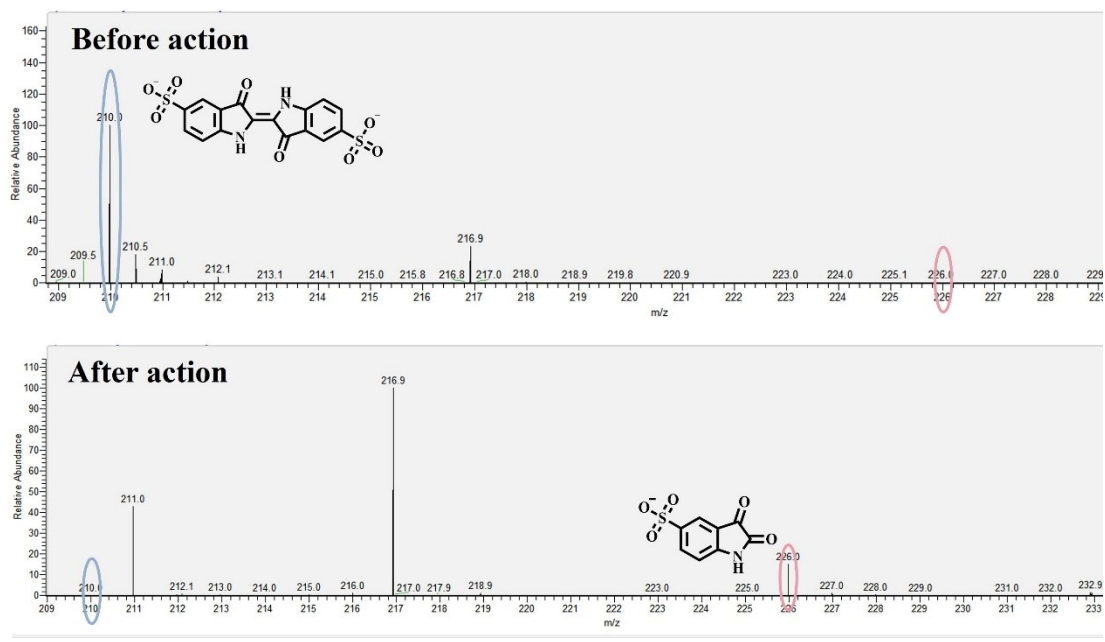

**Fig. S9** High resolution mass spectrometry of IDS before and after oxidation reaction in microdroplets.

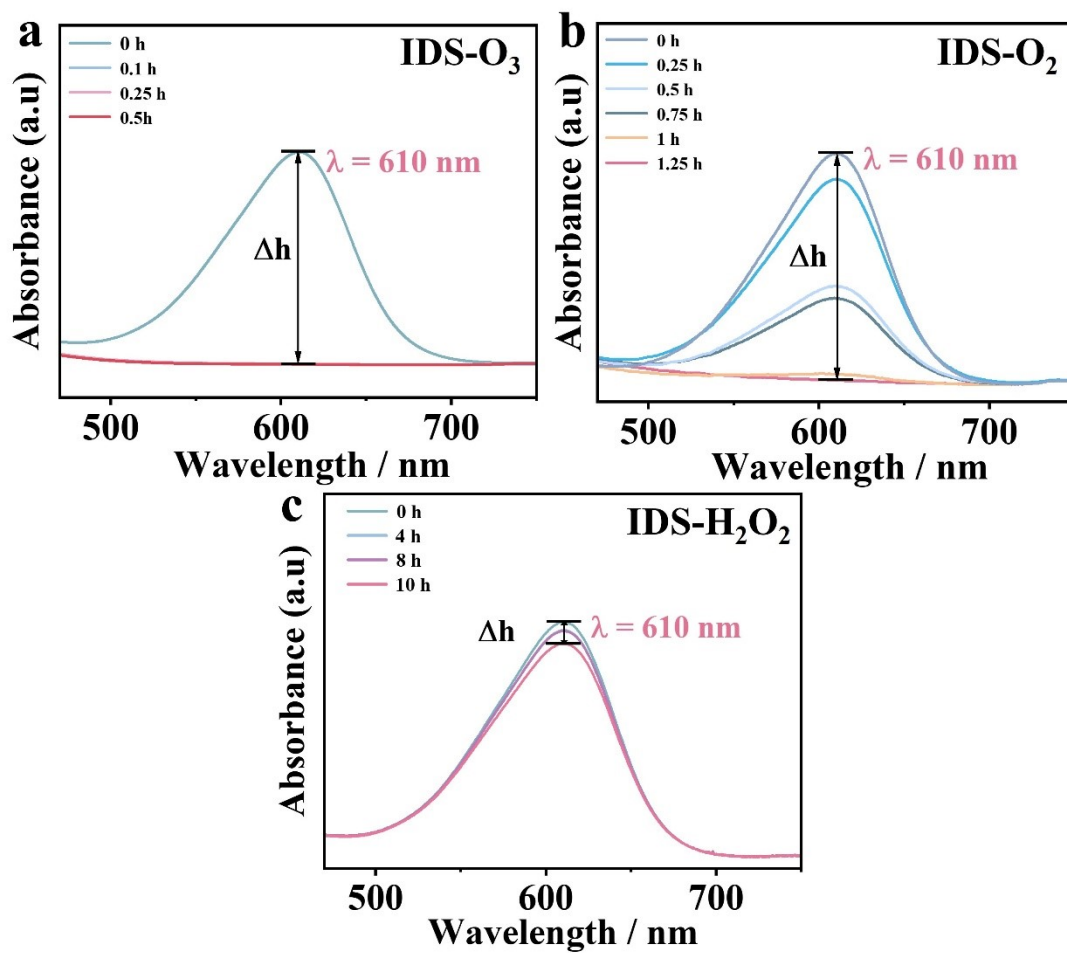

**Fig. S10** UV visible absorption spectra of (a) IDS-O<sub>3</sub>, (b) IDS-O<sub>2</sub> and (c) IDS-H<sub>2</sub>O<sub>2</sub> at different reaction times.  $\Delta h$  represents the absorbance change at 610 nm, defined as  $\Delta h = A_t - A_0$ , t (t = 0.1, 0.25 h, 0.5 h, 0.75 h, 1 h, 1.25 h, 4 h, 8 h, 10 h),  $A_0$  is the absorbance at 0 h.

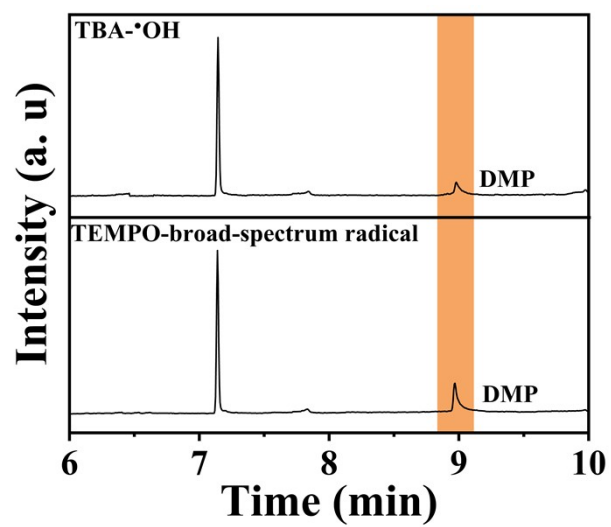

Fig. S11 Radical quenching experiments using tert-butanol (TBA) and TEMPO.

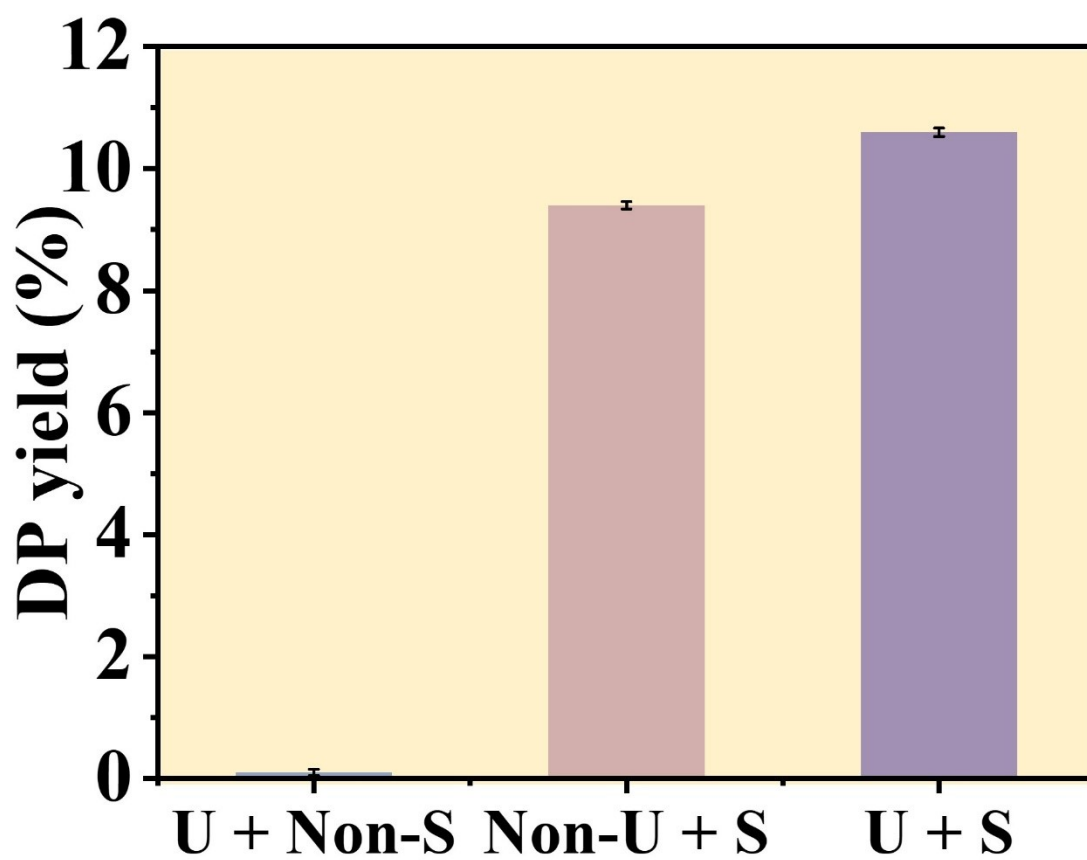

**Fig. S12** Ultrasonic + non spray, non ultrasonic + spray and ultrasonic + spray were used for the microdroplets reaction of naphthalene oxidation to dimethyl phthalate in air atmosphere.

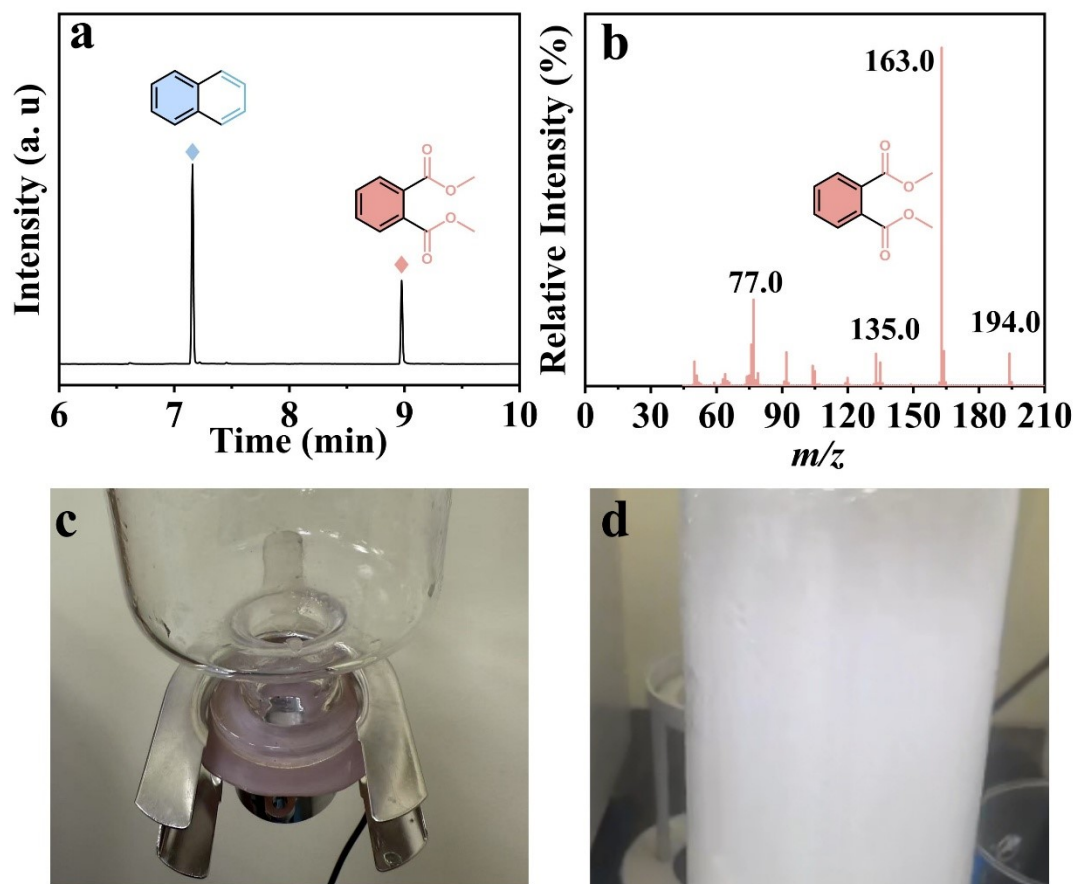

**Fig. S13** (a) Gas chromatogram and (b) mass spectrum of spontaneous oxidation of naphthalene droplets produced in an inverted spray device (c) and (d).

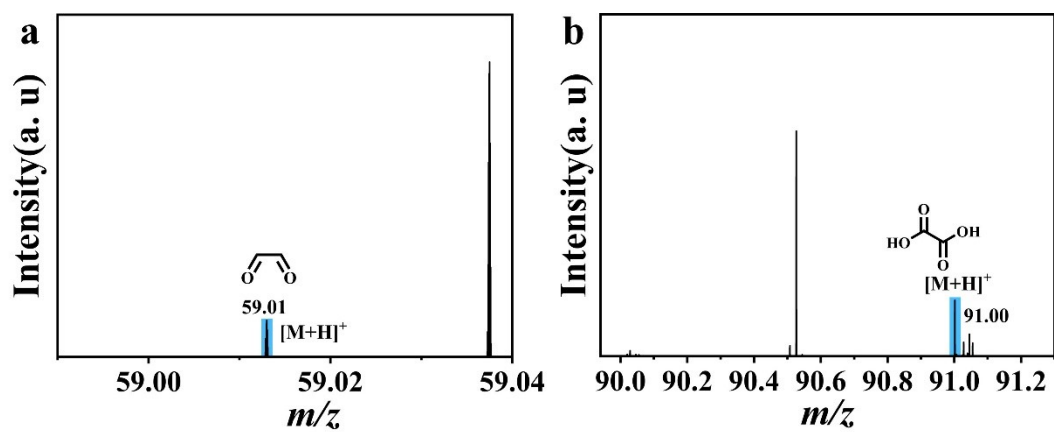

Fig. S14 High resolution mass spectrometry of glyoxal and oxalic acid.

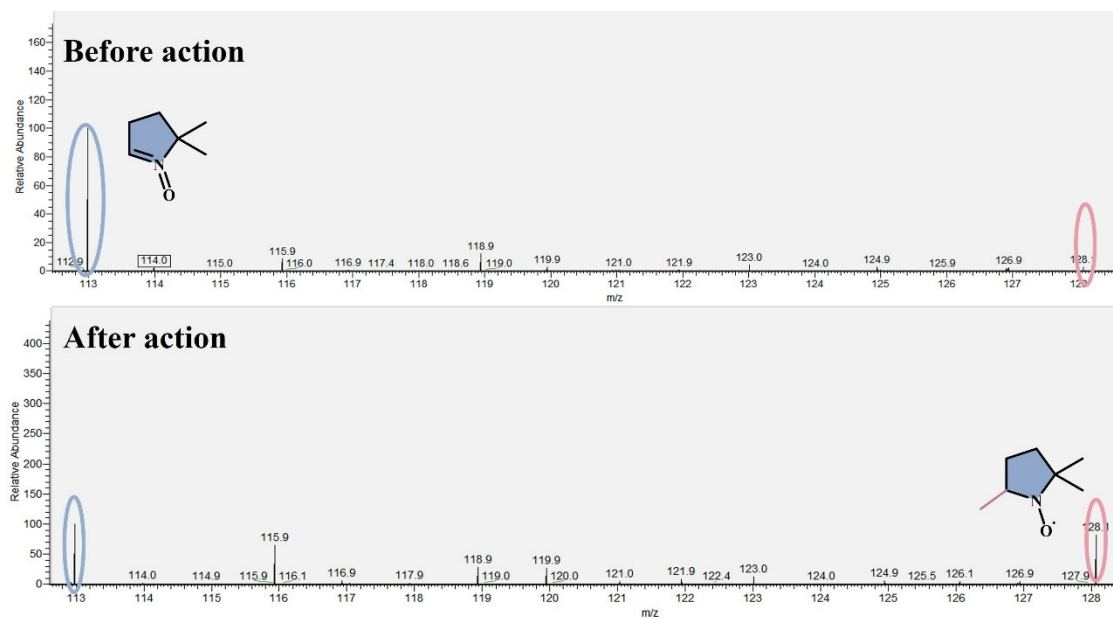

**Fig. S15** High resolution mass spectrometry of DMPO capturing  $\cdot\text{CH}_3$  before and after microdroplet reaction.

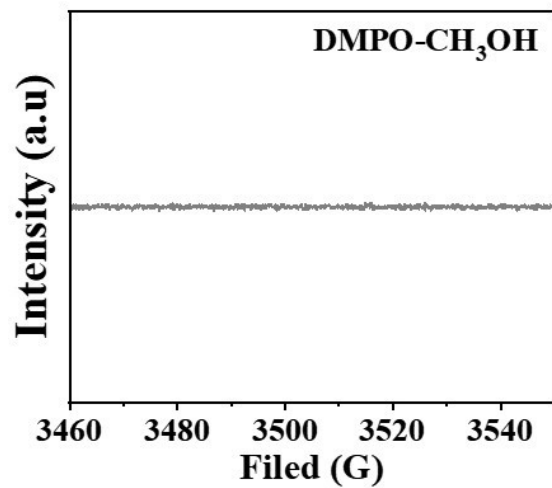

**Fig. S16** EPR spectrum of pure CH<sub>3</sub>OH-DMPO.

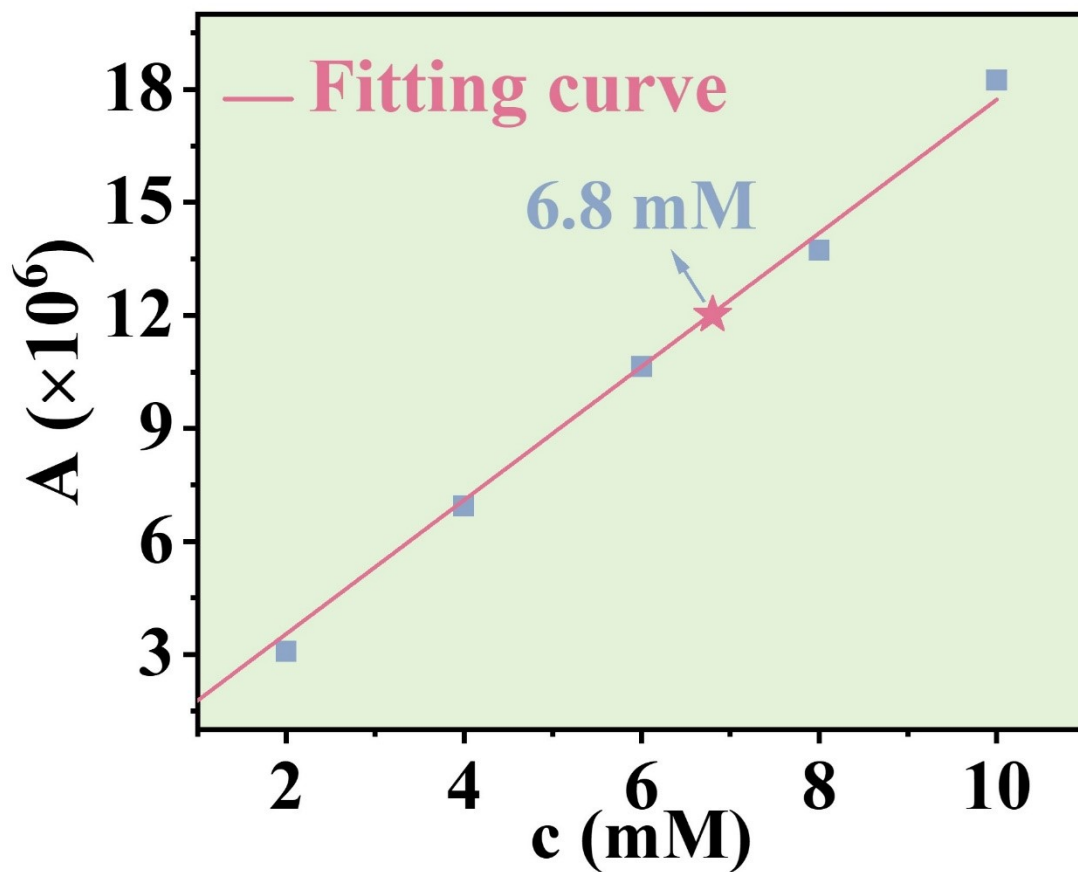

**Fig. S17** The calibration curves of dimethyl phthalate with 5 concentrations (2 mM, 4 mM, 6 mM, 8 mM, and 10 mM) using a gas chromatography.

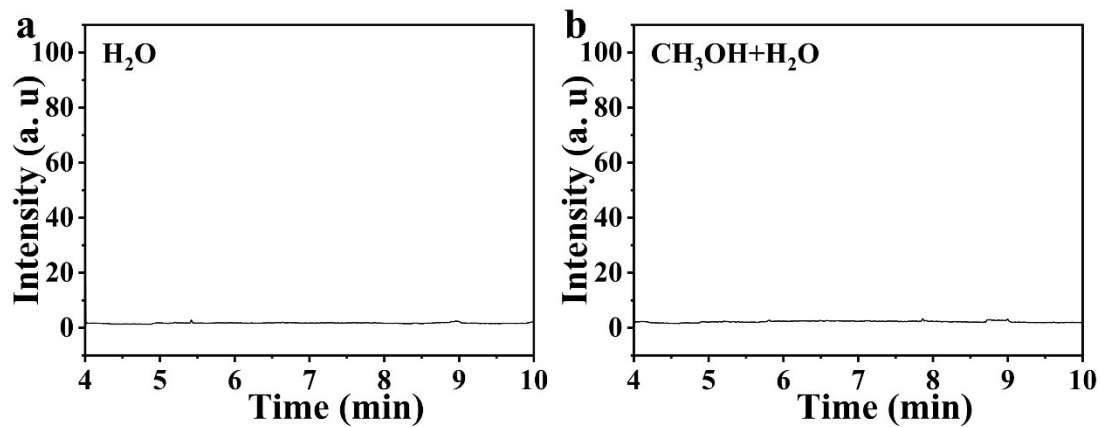

Fig. S18 (a) GC-MS chromatogram of microdroplet control experiment of pure water and  
(b) water-methanol mixed solution.

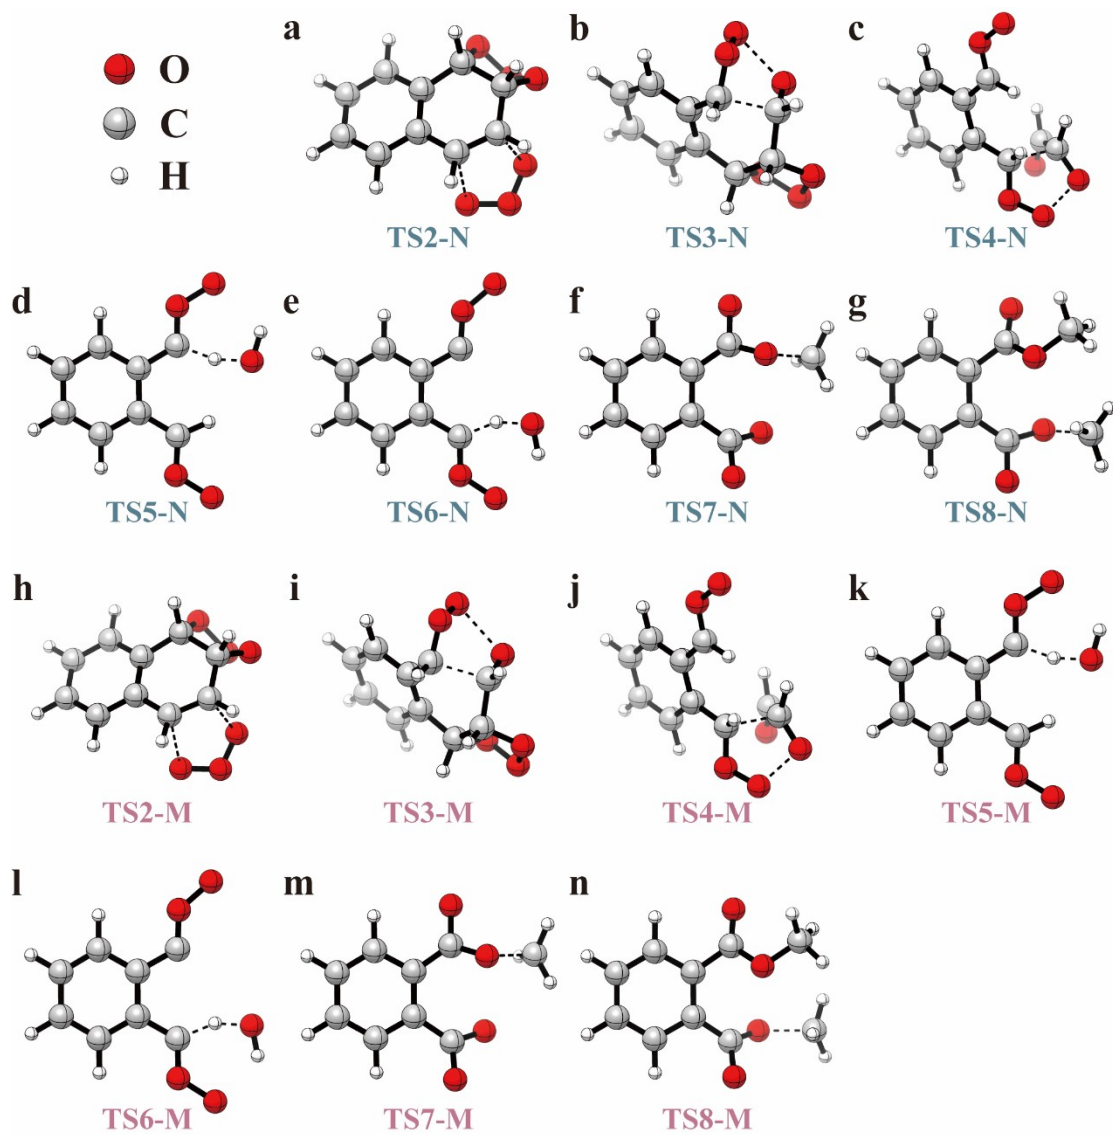

**Fig. S19** The optimized structures of transition states

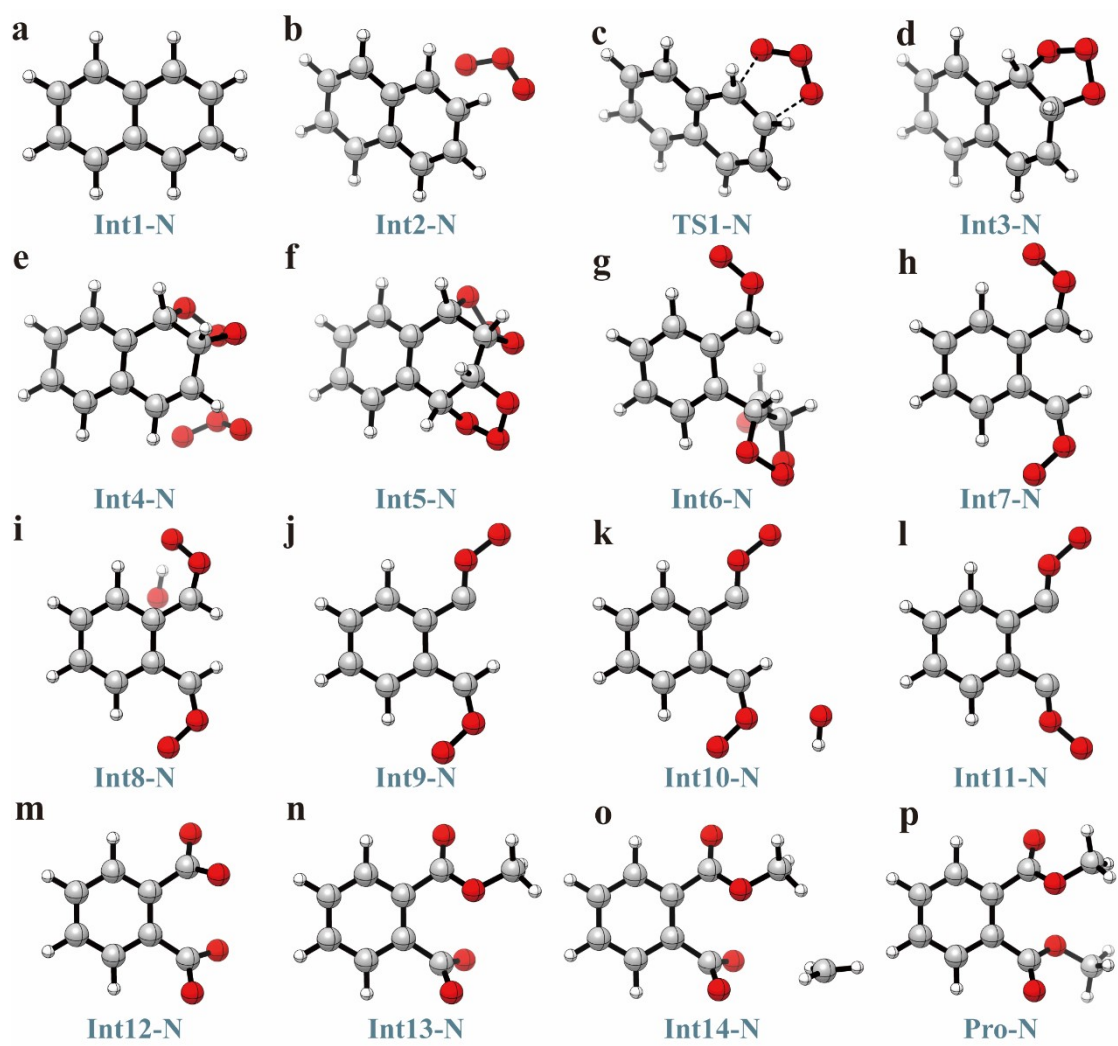

**Fig. S20** The optimized structures without microdroplets.

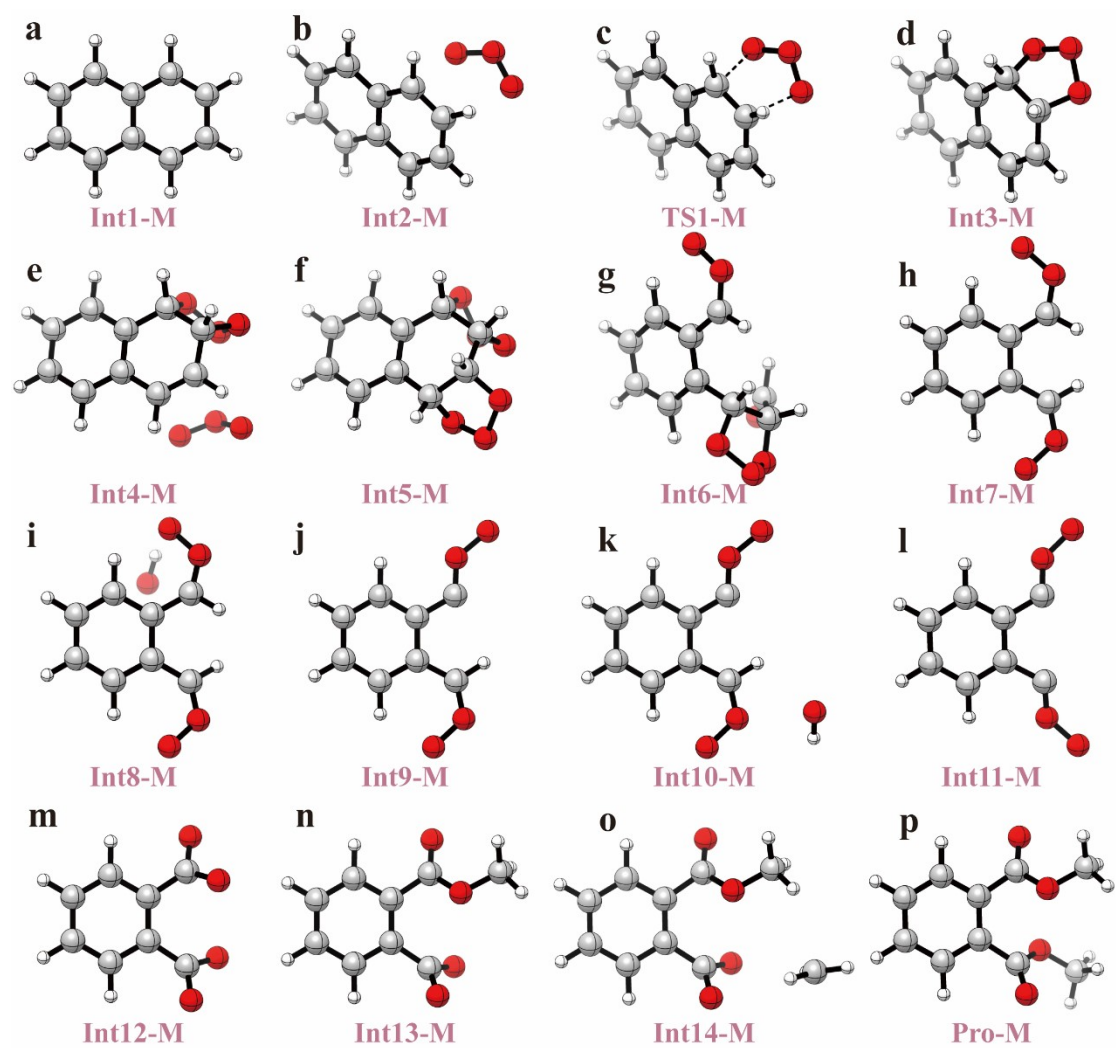

**Fig. S21** The optimized structures in microdroplets.

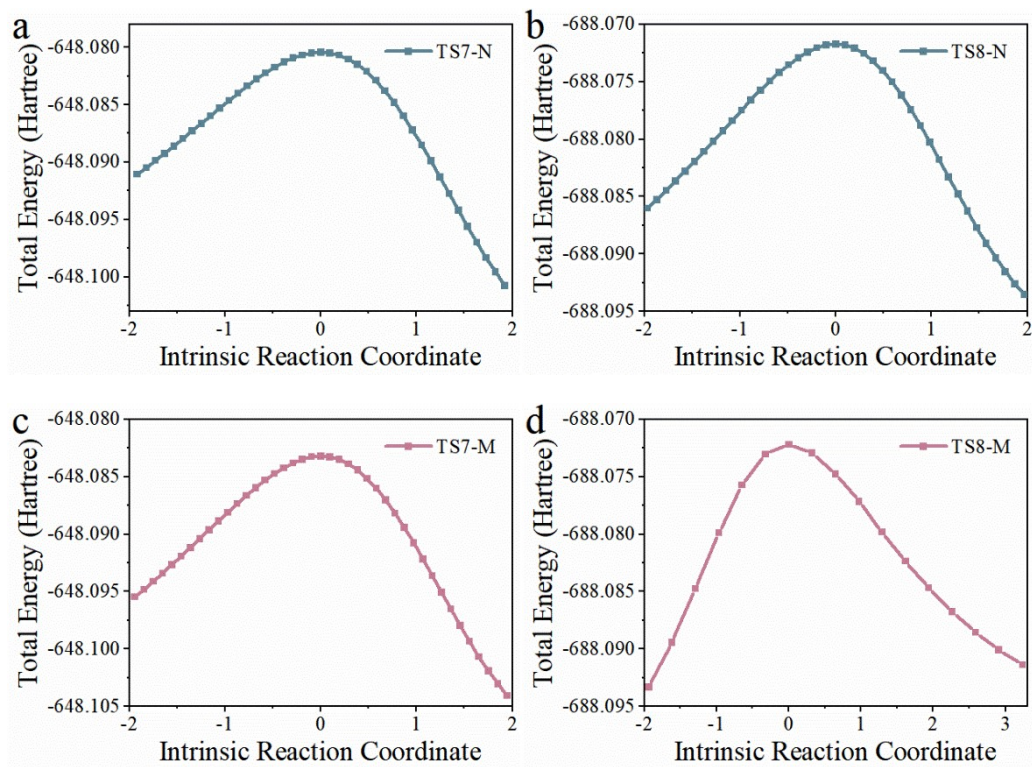

**Fig. S22** Total Energy along IRC path: TS7 and TS8 without microdroplets (a) and (b); in microdroplets (c) and (d).

**Table S1.** A series of microdroplet reactions of naphthalene oxidation carried out under different conditions.

| Entry | Naphthalene (mM) | Gas atmosphere | Response modes | Concentration rate of dimethyl phthalate (mM) |
|-------|------------------|----------------|----------------|-----------------------------------------------|
| 1     | 72.0             | O <sub>2</sub> | Microdroplet   | 8.4                                           |
| 2     | 72.0             | Air            | Microdroplet   | 6.8                                           |
| 3     | 72.0             | N <sub>2</sub> | Microdroplet   | -                                             |
| 4     | 72.0             | O <sub>2</sub> | Stir           | -                                             |
| 5     | 72.0             | Air            | Stir           | -                                             |
| 6     | 72.0             | N <sub>2</sub> | Stir           | -                                             |

**Reaction condition:** 50 °C, CH<sub>3</sub>OH:H<sub>2</sub>O=1:5.5, reaction time: 4h

**Table S2.** The energy consumptions and E-factor for the microdroplet spraying process used in naphthalene oxidation.

| Electric power    | Reaction time | Product molar | Energy consumption | E-factor |
|-------------------|---------------|---------------|--------------------|----------|
| 10 W              | 4 h           | 0.477 mmol    | 301.89 kJ/mmol     | 17.87    |
| Microdroplet 20 W | 4 h           | 0.846 mmol    | 340.43 kJ/mmol     | 9.64     |
| 30 W              | 4 h           | 0.927 mmol    | 466.02 kJ/mmol     | 8.71     |
| Ozonizer 80 W     | 4h            | 0.106 mmol    | 10867.93 kJ/mmol   | 83.91    |

The energy consumption (E) was obtained using the following formula:

$E = W * t / C$  W: the power of the experimental device (in kW)

t: reaction time (in h)

C: amount of the products (in mmol)

The E-factor was obtained using the following formula:

$$\text{E-factor} = \frac{\text{Total mass of waste generated}}{\text{Mass of isolated product}}$$

**Table S3.** A series of microdroplet reactions of naphthalene oxidation carried out under different conditions.

| Entry | Addictive                     | Gas atmosphere | Response modes | Concentration rate of dimethyl phthalate (mM) |
|-------|-------------------------------|----------------|----------------|-----------------------------------------------|
| 1     | Catalase                      | Air            | Microdroplet   | 6.75                                          |
| 2     | -                             | Air            | Microdroplet   | 6.8                                           |
| 3     | H <sub>2</sub> O <sub>2</sub> | N <sub>2</sub> | Microdroplet   | -                                             |
| 4     | -                             | N <sub>2</sub> | Microdroplet   | -                                             |
| 5     | -                             | Air            | Stir           | -                                             |
| 6     | -                             | N <sub>2</sub> | Stir           | -                                             |

The coordinates of the optimized structures

| Int1-N |           |           |           |
|--------|-----------|-----------|-----------|
| C      | 2.428023  | 0.707201  | 0.000117  |
| C      | 1.242005  | 1.400055  | 0.00003   |
| C      | 0.000002  | 0.71518   | -0.000021 |
| C      | -0.000002 | -0.715179 | 0.00002   |
| C      | 1.242006  | -1.400055 | 0.000112  |
| C      | 2.428022  | -0.707201 | 0.000158  |
| H      | -1.239362 | 2.48476   | -0.000143 |
| H      | 3.370321  | 1.24257   | 0.000155  |
| H      | 1.23936   | 2.484759  | -0.000002 |
| C      | -1.242008 | 1.400056  | -0.000112 |
| C      | -1.242006 | -1.400057 | -0.00003  |
| H      | 1.239362  | -2.484759 | 0.000143  |
| H      | 3.370321  | -1.24257  | 0.000227  |
| C      | -2.428021 | -0.707202 | -0.000116 |
| C      | -2.428021 | 0.707201  | -0.000159 |
| H      | -1.239355 | -2.48476  | 0.000002  |
| H      | -3.370323 | -1.242566 | -0.000153 |
| H      | -3.370322 | 1.242567  | -0.000228 |

| O <sub>3</sub> -N |         |           |   |
|-------------------|---------|-----------|---|
| O                 | 0       | 0.428312  | 0 |
| O                 | 1.0793  | -0.214289 | 0 |
| O                 | -1.0793 | -0.214024 | 0 |

| Int2-N |           |           |           |
|--------|-----------|-----------|-----------|
| C      | -0.967247 | 1.99597   | 0.347252  |
| C      | 0.231663  | 1.968311  | -0.321472 |
| C      | 1.123404  | 0.870372  | -0.184993 |
| C      | 0.752169  | -0.218987 | 0.659255  |
| C      | -0.504495 | -0.173186 | 1.320142  |
| C      | -1.341145 | 0.919017  | 1.178691  |
| H      | 2.649875  | 1.651027  | -1.497964 |
| H      | -1.637088 | 2.839145  | 0.231625  |
| H      | 0.51743   | 2.792217  | -0.966513 |
| C      | 2.36952   | 0.823315  | -0.855634 |
| C      | 1.638091  | -1.31299  | 0.799644  |
| H      | -0.782227 | -0.99523  | 1.970014  |
| H      | -2.28208  | 0.955408  | 1.713351  |

|   |           |           |           |
|---|-----------|-----------|-----------|
| C | 2.843738  | -1.330432 | 0.136196  |
| C | 3.212339  | -0.253098 | -0.698565 |
| H | 1.349556  | -2.14202  | 1.436487  |
| H | 3.514543  | -2.17374  | 0.251024  |
| H | 4.163306  | -0.278494 | -1.217654 |
| O | -2.897435 | -1.28654  | -0.575652 |
| O | -3.410428 | -0.128174 | -0.691901 |
| O | -1.647328 | -1.382543 | -0.757881 |

| TS1-N |           |           |           |
|-------|-----------|-----------|-----------|
| C     | -1.11404  | 1.924278  | 0.393146  |
| C     | 0.139925  | 2.010347  | -0.123523 |
| C     | 1.050116  | 0.897946  | -0.090696 |
| C     | 0.626903  | -0.324707 | 0.48913   |
| C     | -0.738358 | -0.453572 | 0.935286  |
| C     | -1.602283 | 0.686368  | 0.909105  |
| H     | 2.691084  | 1.938201  | -1.020304 |
| H     | -1.771268 | 2.784591  | 0.394706  |
| H     | 0.492211  | 2.945504  | -0.545253 |
| C     | 2.367159  | 1.004167  | -0.57467  |
| C     | 1.529115  | -1.397203 | 0.577825  |
| H     | -0.976569 | -1.269864 | 1.603634  |
| H     | -2.489231 | 0.684604  | 1.526074  |
| C     | 2.821528  | -1.270525 | 0.099625  |
| C     | 3.240446  | -0.064773 | -0.482757 |
| H     | 1.195935  | -2.331848 | 1.014598  |
| H     | 3.5101    | -2.103881 | 0.171319  |
| H     | 4.252363  | 0.029064  | -0.858833 |
| O     | -2.750087 | -1.185401 | -0.562671 |
| O     | -2.875956 | 0.115554  | -0.698295 |
| O     | -1.477419 | -1.523944 | -0.624131 |

| In3-N |           |           |           |
|-------|-----------|-----------|-----------|
| C     | -1.192981 | 1.86349   | 0.219303  |
| C     | 0.098836  | 1.994173  | -0.094675 |
| C     | 1.049526  | 0.885464  | -0.052564 |
| C     | 0.61443   | -0.406775 | 0.286168  |
| C     | -0.840175 | -0.680273 | 0.541655  |
| C     | -1.788614 | 0.556006  | 0.630982  |
| H     | 2.747115  | 2.090217  | -0.582588 |
| H     | -1.864896 | 2.713136  | 0.185733  |
| H     | 0.486531  | 2.965289  | -0.384837 |

|   |           |           |           |
|---|-----------|-----------|-----------|
| C | 2.407221  | 1.09381   | -0.322315 |
| C | 1.529218  | -1.453696 | 0.356421  |
| H | -0.97297  | -1.303506 | 1.430231  |
| H | -2.22791  | 0.613277  | 1.632433  |
| C | 2.877804  | -1.235971 | 0.08162   |
| C | 3.315036  | 0.041954  | -0.26079  |
| H | 1.182406  | -2.446344 | 0.621322  |
| H | 3.581442  | -2.057809 | 0.136772  |
| H | 4.362536  | 0.219161  | -0.474354 |
| O | -2.768684 | -1.190523 | -0.445549 |
| O | -2.838757 | 0.247683  | -0.318759 |
| O | -1.357066 | -1.399974 | -0.595635 |

---

In4-N

---

|   |           |           |           |
|---|-----------|-----------|-----------|
| C | 3.395286  | 1.207079  | -0.129212 |
| C | 2.20138   | 1.547698  | 0.496882  |
| C | 1.173486  | 0.608349  | 0.633304  |
| C | 1.356509  | -0.688195 | 0.126466  |
| C | 2.557672  | -1.024452 | -0.491835 |
| C | 3.576736  | -0.083211 | -0.62363  |
| H | 4.183339  | 1.944018  | -0.229106 |
| H | 2.055708  | 2.549816  | 0.884581  |
| H | 2.695167  | -2.02787  | -0.880095 |
| H | 4.506662  | -0.356442 | -1.107658 |
| C | 0.254238  | -1.712703 | 0.196877  |
| H | 0.663382  | -2.691312 | 0.452698  |
| C | -0.069833 | 0.955293  | 1.314733  |
| H | -0.182658 | 1.97677   | 1.658457  |
| C | -0.950756 | -1.370347 | 1.123155  |
| H | -0.996793 | -2.047384 | 1.97999   |
| C | -1.035985 | 0.059325  | 1.562377  |
| H | -1.927445 | 0.335526  | 2.11098   |
| O | -1.663407 | -1.287195 | -0.975454 |
| O | -2.082792 | -1.744186 | 0.316618  |
| O | -0.368591 | -1.91655  | -1.102827 |
| O | -2.290153 | 1.583704  | -1.044324 |
| O | -3.033126 | 1.447716  | -0.036293 |
| O | -1.28065  | 2.331995  | -0.923288 |

---

TS2-N

---

|   |          |          |           |
|---|----------|----------|-----------|
| C | 3.379796 | 0.835191 | -0.191962 |
| C | 2.235859 | 1.394833 | 0.355969  |

|   |           |           |           |
|---|-----------|-----------|-----------|
| C | 1.09148   | 0.612849  | 0.576796  |
| C | 1.117628  | -0.752189 | 0.252423  |
| C | 2.270844  | -1.306131 | -0.299536 |
| C | 3.395504  | -0.519677 | -0.528388 |
| H | 4.254767  | 1.449781  | -0.365986 |
| H | 2.203862  | 2.451752  | 0.594082  |
| H | 2.284041  | -2.359265 | -0.555546 |
| H | 4.283848  | -0.962112 | -0.963136 |
| C | -0.049194 | -1.661522 | 0.553812  |
| H | 0.259079  | -2.418103 | 1.278906  |
| C | -0.120935 | 1.227123  | 1.086919  |
| H | -0.041207 | 2.211892  | 1.527219  |
| C | -1.365827 | -0.969082 | 1.032245  |
| H | -1.679179 | -1.387224 | 1.992293  |
| C | -1.312786 | 0.532485  | 1.179371  |
| H | -2.139581 | 0.970475  | 1.722283  |
| O | -1.573593 | -1.645998 | -1.092778 |
| O | -2.346951 | -1.449178 | 0.105116  |
| O | -0.475288 | -2.426926 | -0.58604  |
| O | -1.892891 | 2.368049  | -0.68932  |
| O | -2.269097 | 1.129891  | -0.628833 |
| O | -0.602162 | 2.484103  | -0.775145 |

---

Int5-N

---

|   |           |           |           |
|---|-----------|-----------|-----------|
| C | -3.197961 | -1.389903 | -0.266744 |
| C | -1.873037 | -1.789463 | -0.164139 |
| C | -0.873858 | -0.868285 | 0.167349  |
| C | -1.211596 | 0.465956  | 0.40606   |
| C | -2.552164 | 0.855414  | 0.322124  |
| C | -3.53928  | -0.060241 | -0.015682 |
| H | -3.963199 | -2.109619 | -0.531127 |
| H | -1.599207 | -2.822997 | -0.343664 |
| H | -2.814441 | 1.891616  | 0.503219  |
| H | -4.572386 | 0.259152  | -0.083239 |
| C | -0.188047 | 1.538273  | 0.700172  |
| H | -0.45377  | 2.106327  | 1.593168  |
| C | 0.532336  | -1.358494 | 0.311619  |
| H | 0.554221  | -2.340665 | 0.793824  |
| C | 1.294163  | 1.073588  | 0.737762  |
| H | 1.854833  | 1.660354  | 1.468045  |
| C | 1.49566   | -0.418065 | 1.040769  |
| H | 1.432725  | -0.582337 | 2.121915  |
| O | -0.157112 | 2.509191  | -0.355236 |



| Int7-N  |           |           |           | TSS5-N |           |           |           |
|---------|-----------|-----------|-----------|--------|-----------|-----------|-----------|
| C       | 0.694644  | 2.401682  | -0.006475 | C      | 0.790198  | 2.985294  | -0.000005 |
| C       | 1.402008  | 1.202156  | -0.005082 | C      | -0.362073 | 2.222867  | -0.000002 |
| C       | 0.723333  | -0.02917  | 0.011835  | C      | -0.28911  | 0.814908  | 0.000001  |
| C       | -0.723333 | -0.029176 | -0.011823 | C      | 0.983312  | 0.17436   | 0.000001  |
| C       | -1.402018 | 1.202144  | 0.005088  | C      | 2.139899  | 0.978181  | -0.000003 |
| C       | -0.694665 | 2.401676  | 0.006481  | C      | 2.043697  | 2.35777   | -0.000006 |
| H       | 1.241306  | 3.337     | -0.010558 | H      | -1.335614 | 2.695323  | -0.000003 |
| H       | 2.479934  | 1.18374   | -0.004032 | H      | 3.109564  | 0.499164  | -0.000003 |
| H       | -2.479944 | 1.18372   | 0.004033  | H      | 2.946735  | 2.955909  | -0.000008 |
| H       | -1.241335 | 3.33699   | 0.010563  | H      | 0.722317  | 4.066062  | -0.000008 |
| C       | -1.430349 | -1.269508 | -0.141574 | C      | 1.102098  | -1.262878 | 0.000004  |
| H       | -0.910317 | -2.19681  | -0.343249 | H      | 0.2745    | -1.966679 | 0.000005  |
| C       | 1.430359  | -1.269496 | 0.141602  | C      | -1.49106  | 0.029319  | 0.000004  |
| H       | 0.910337  | -2.196794 | 0.343314  | H      | -1.621712 | -1.258744 | -0.000007 |
| O       | -2.688024 | -1.501288 | -0.10089  | O      | 2.272585  | -1.76322  | 0.000005  |
| O       | -3.597352 | -0.518076 | 0.127001  | O      | -2.626238 | 0.570456  | 0.000014  |
| O       | 2.688034  | -1.501274 | 0.100892  | O      | -2.086791 | -2.35821  | -0.000026 |
| O       | 3.597359  | -0.518072 | -0.127051 | H      | -3.047402 | -2.199396 | -0.000019 |
|         |           |           |           | O      | -3.786007 | -0.163714 | 0.000009  |
|         |           |           |           | O      | 2.407681  | -3.109133 | 0.000008  |
| Int8-N  |           |           |           | Int9-N |           |           |           |
| C       | -0.920223 | 2.427276  | 0.06138   | C      | 0.071126  | 2.649639  | -0.000462 |
| C       | -1.599414 | 1.210832  | 0.021487  | C      | 1.040221  | 1.655403  | -0.001533 |
| C       | -0.896443 | 0.002812  | 0.153509  | C      | 0.662779  | 0.304968  | -0.001333 |
| C       | 0.526294  | 0.045461  | 0.367528  | C      | -0.722766 | -0.051332 | -0.000756 |
| C       | 1.183803  | 1.286884  | 0.372356  | C      | -1.684205 | 0.978257  | 0.000561  |
| C       | 0.458043  | 2.466387  | 0.232408  | C      | -1.281872 | 2.309002  | 0.00064   |
| H       | -1.480004 | 3.347427  | -0.054873 | H      | 2.092529  | 1.908543  | -0.002498 |
| H       | -2.665989 | 1.165343  | -0.128589 | H      | -2.725498 | 0.699101  | 0.001397  |
| H       | 2.253302  | 1.304034  | 0.512     | H      | -2.034289 | 3.088185  | 0.001369  |
| H       | 0.979828  | 3.415125  | 0.255506  | H      | 0.371924  | 3.69043   | -0.000505 |
| C       | 1.218148  | -1.160813 | 0.734332  | C      | -1.048565 | -1.449214 | -0.001689 |
| H       | 0.682541  | -2.000856 | 1.16326   | H      | -0.254537 | -2.188626 | -0.00386  |
| C       | -1.520178 | -1.272474 | -0.047812 | C      | 1.663063  | -0.732718 | -0.00339  |
| H       | -0.926372 | -2.165709 | -0.198773 | O      | -2.194096 | -2.008991 | -0.000554 |
| O       | 2.463224  | -1.420064 | 0.680964  | O      | 2.876135  | -0.505327 | 0.006211  |
| O       | 3.336441  | -0.519465 | 0.112229  | O      | 3.955179  | -1.350719 | -0.001266 |
| O       | -2.762009 | -1.560793 | -0.142253 | O      | -3.34332  | -1.282673 | 0.002093  |
| O       | -3.725322 | -0.614276 | -0.012423 |        |           |           |           |
| O       | 1.676609  | -0.231423 | -2.054085 |        |           |           |           |
| H       | 2.544969  | -0.335376 | -1.595115 |        |           |           |           |
| Int10-N |           |           |           |        |           |           |           |

|   |           |           |           |
|---|-----------|-----------|-----------|
| C | -0.509167 | -2.907037 | 0.002039  |
| C | 0.541876  | -1.997473 | 0.000909  |
| C | 0.279987  | -0.613339 | -0.002179 |
| C | -1.08054  | -0.172273 | -0.003083 |
| C | -2.121248 | -1.111576 | -0.002545 |
| C | -1.834075 | -2.470229 | 0.000306  |
| H | -0.29054  | -3.967867 | 0.004123  |
| H | 1.570869  | -2.319458 | 0.002185  |
| H | -3.145958 | -0.763266 | -0.004259 |
| H | -2.64522  | -3.188431 | 0.000999  |
| C | -1.371367 | 1.240726  | -0.008044 |
| C | 1.302543  | 0.392716  | -0.004517 |
| H | 1.044441  | 1.446238  | -0.009101 |
| O | -2.52148  | 1.688721  | 0.012354  |
| O | -2.994637 | 2.972569  | -0.002573 |
| O | 2.568287  | 0.242219  | -0.002386 |
| O | 3.157719  | -0.983025 | 0.003571  |
| O | 3.294211  | 2.628038  | 0.002522  |
| H | 4.185555  | 2.23551   | 0.000831  |

---

TS6-N

|   |           |           |           |
|---|-----------|-----------|-----------|
| C | 2.055597  | 2.349972  | 0.092585  |
| C | 2.158223  | 0.968448  | 0.072358  |
| C | 0.99857   | 0.174727  | 0.019329  |
| C | -0.274925 | 0.799206  | -0.002997 |
| C | -0.355331 | 2.20291   | 0.019022  |
| C | 0.799138  | 2.966868  | 0.064506  |
| H | 3.126135  | 0.48492   | 0.094983  |
| H | -1.328871 | 2.674957  | 0.005272  |
| H | 0.726606  | 4.047352  | 0.083063  |
| H | 2.954117  | 2.953693  | 0.131961  |
| C | -1.466879 | -0.013417 | -0.033991 |
| H | -1.574741 | -1.295384 | 0.189677  |
| C | 1.080924  | -1.267377 | 0.005117  |
| O | -2.5847   | 0.525638  | -0.23445  |
| O | 2.156279  | -1.85114  | -0.170725 |
| O | -2.154503 | -2.310232 | 0.419332  |
| H | -3.091244 | -2.065026 | 0.290233  |
| O | 2.492442  | -3.16923  | -0.115055 |
| O | -3.757506 | -0.181102 | -0.175448 |

---

Int11-N

|   |           |           |           |
|---|-----------|-----------|-----------|
| C | 0.700044  | 2.686663  | -0.024944 |
| C | 1.403903  | 1.493291  | 0.021868  |
| C | 0.708132  | 0.272931  | 0.069387  |
| C | -0.708113 | 0.272732  | 0.069084  |
| C | -1.404174 | 1.492952  | 0.021047  |
| C | -0.700607 | 2.686491  | -0.025419 |
| H | 1.23893   | 3.625638  | -0.061948 |
| H | 2.486213  | 1.486272  | 0.024799  |
| H | -2.486485 | 1.485634  | 0.023362  |
| H | -1.239706 | 3.625328  | -0.062812 |
| C | -1.393863 | -0.99208  | 0.163005  |
| C | 1.394016  | -0.991882 | 0.162955  |
| O | -2.573801 | -1.114186 | -0.194624 |
| O | -3.466869 | -2.120493 | 0.028236  |
| O | 2.574116  | -1.113755 | -0.194125 |
| O | 3.467182  | -2.120248 | 0.027351  |

---

Int12-N

|   |           |           |           |
|---|-----------|-----------|-----------|
| C | 2.650899  | -0.695943 | 0.000507  |
| C | 1.4456    | -1.393439 | 0.008683  |
| C | 0.23241   | -0.703358 | 0.009255  |
| C | 0.232371  | 0.703363  | -0.009269 |
| C | 1.445523  | 1.393513  | -0.00869  |
| C | 2.65086   | 0.696083  | -0.000502 |
| H | 3.587002  | -1.240686 | 0.003129  |
| H | 1.434834  | -2.475851 | 0.03367   |
| H | 1.434696  | 2.475924  | -0.033668 |
| H | 3.586933  | 1.240878  | -0.003113 |
| C | -1.003284 | 1.514714  | -0.117441 |
| C | -1.003213 | -1.514759 | 0.117424  |
| O | -1.124303 | 2.639732  | 0.431675  |
| O | -1.12414  | -2.639829 | -0.431612 |
| O | -1.997662 | -1.20274  | 0.815559  |
| O | -1.997702 | 1.202674  | -0.815599 |

---

Int13-N

|   |          |           |           |
|---|----------|-----------|-----------|
| C | 2.661111 | -1.44739  | 0.098154  |
| C | 1.304563 | -1.745982 | 0.00287   |
| C | 0.355936 | -0.72614  | -0.040357 |
| C | 0.784754 | 0.613369  | -0.014383 |
| C | 2.14873  | 0.907049  | 0.088452  |
| C | 3.083574 | -0.120605 | 0.148746  |



|   |          |          |           |
|---|----------|----------|-----------|
| H | 3.349315 | 1.202204 | 1.338201  |
| H | 3.138141 | 1.772437 | -0.348966 |
| H | 2.518627 | 2.751185 | 0.997688  |

---

|       |           |           |           |
|-------|-----------|-----------|-----------|
| Pro-N |           |           |           |
| C     | -3.217347 | -0.686557 | 0.11487   |
| C     | -2.011781 | -1.372914 | 0.219149  |
| C     | -0.797934 | -0.695158 | 0.097668  |
| C     | -0.797737 | 0.69523   | -0.097812 |
| C     | -2.011382 | 1.373359  | -0.219135 |
| C     | -3.217148 | 0.687371  | -0.114677 |
| H     | -4.153386 | -1.224727 | 0.204732  |
| H     | -1.995041 | -2.443148 | 0.382277  |
| H     | -1.994362 | 2.443586  | -0.382284 |
| H     | -4.153032 | 1.225833  | -0.204415 |
| C     | 0.445841  | 1.522407  | -0.12435  |
| C     | 0.445365  | -1.522719 | 0.124061  |
| O     | 0.623959  | 2.465789  | -0.856473 |
| O     | 0.622853  | -2.466828 | 0.8554    |
| O     | 1.321478  | -1.13364  | -0.82251  |
| C     | 2.572469  | -1.841528 | -0.843783 |
| H     | 3.137817  | -1.406043 | -1.664273 |
| H     | 3.096812  | -1.705727 | 0.103438  |
| H     | 2.405798  | -2.905928 | -1.011656 |
| O     | 1.321329  | 1.133925  | 0.823065  |
| C     | 2.572573  | 1.841378  | 0.844356  |
| H     | 3.137369  | 1.40641   | 1.665502  |
| H     | 3.097354  | 1.704585  | -0.10248  |
| H     | 2.406209  | 2.905985  | 1.011221  |

---

|        |           |           |           |
|--------|-----------|-----------|-----------|
| Int1-M |           |           |           |
| C      | 2.428441  | 0.707365  | 0.001356  |
| C      | 1.242269  | 1.400272  | 0.006632  |
| C      | 0         | 0.715174  | 0.011332  |
| C      | -0.000001 | -0.715173 | 0.011374  |
| C      | 1.242269  | -1.400271 | 0.006714  |
| C      | 2.428441  | -0.707364 | 0.001397  |
| H      | -1.23966  | 2.484991  | -0.001921 |
| H      | 3.370762  | 1.242677  | -0.011585 |
| H      | 1.239659  | 2.484991  | -0.001781 |

|   |           |           |           |
|---|-----------|-----------|-----------|
| C | -1.24227  | 1.400272  | 0.006492  |
| C | -1.242269 | -1.400272 | 0.006574  |
| H | 1.23966   | -2.48499  | -0.001635 |
| H | 3.370763  | -1.242676 | -0.011512 |
| C | -2.42844  | -0.707366 | 0.001122  |
| C | -2.42844  | 0.707365  | 0.001081  |
| H | -1.239658 | -2.484991 | -0.001775 |
| H | -3.370761 | -1.242676 | -0.011895 |
| H | -3.370761 | 1.242675  | -0.011968 |

---

|                   |           |           |   |
|-------------------|-----------|-----------|---|
| O <sub>3</sub> -M |           |           |   |
| O                 | -0.001935 | 0.428711  | 0 |
| O                 | 1.080053  | -0.215064 | 0 |
| O                 | -1.078117 | -0.213648 | 0 |

---

|        |           |           |           |
|--------|-----------|-----------|-----------|
| Int2-M |           |           |           |
| C      | -0.971068 | 2.003562  | 0.366257  |
| C      | 0.221937  | 1.973591  | -0.310862 |
| C      | 1.11282   | 0.874613  | -0.177043 |
| C      | 0.747808  | -0.210028 | 0.676207  |
| C      | -0.502004 | -0.159646 | 1.34928   |
| C      | -1.340019 | 0.92846   | 1.204958  |
| H      | 2.624058  | 1.642064  | -1.514465 |
| H      | -1.64382  | 2.844336  | 0.250332  |
| H      | 0.501153  | 2.793248  | -0.964159 |
| C      | 2.350972  | 0.819132  | -0.862621 |
| C      | 1.632353  | -1.306857 | 0.810179  |
| H      | -0.777197 | -0.980152 | 2.002255  |
| H      | -2.279205 | 0.966618  | 1.742742  |
| C      | 2.828824  | -1.332778 | 0.131655  |
| C      | 3.191078  | -0.259943 | -0.712735 |
| H      | 1.346053  | -2.133317 | 1.451426  |
| H      | 3.495108  | -2.181026 | 0.23845   |
| H      | 4.133459  | -0.292955 | -1.247557 |
| O      | -2.86427  | -1.282247 | -0.624117 |
| O      | -3.291478 | -0.098833 | -0.765606 |
| O      | -1.620401 | -1.468494 | -0.769123 |

---

|       |           |          |           |
|-------|-----------|----------|-----------|
| TS1-M |           |          |           |
| C     | -1.115137 | 1.920894 | 0.39628   |
| C     | 0.136683  | 2.005778 | -0.125976 |

|   |           |           |           |
|---|-----------|-----------|-----------|
| C | 1.048923  | 0.895223  | -0.092088 |
| C | 0.627745  | -0.326363 | 0.491188  |
| C | -0.739909 | -0.45827  | 0.932546  |
| C | -1.603257 | 0.683037  | 0.913524  |
| H | 2.686329  | 1.933827  | -1.029965 |
| H | -1.7737   | 2.780471  | 0.396369  |
| H | 0.486358  | 2.939393  | -0.554026 |
| C | 2.365217  | 1.001609  | -0.577898 |
| C | 1.531604  | -1.396832 | 0.584217  |
| H | -0.978837 | -1.278343 | 1.596154  |
| H | -2.486944 | 0.68056   | 1.53512   |
| C | 2.824154  | -1.269317 | 0.105906  |
| C | 3.240331  | -0.065652 | -0.482446 |
| H | 1.200908  | -2.331018 | 1.023486  |
| H | 3.513511  | -2.101552 | 0.180238  |
| H | 4.251319  | 0.026562  | -0.861485 |
| O | -2.743424 | -1.175114 | -0.570946 |
| O | -2.882284 | 0.127612  | -0.688212 |
| O | -1.467917 | -1.497598 | -0.638673 |

---

In3-M

---

|   |           |           |           |
|---|-----------|-----------|-----------|
| C | -1.192856 | 1.868929  | 0.227238  |
| C | 0.102842  | 2.001547  | -0.068882 |
| C | 1.050625  | 0.889855  | -0.035084 |
| C | 0.615075  | -0.402518 | 0.301998  |
| C | -0.838412 | -0.675875 | 0.570047  |
| C | -1.797533 | 0.556428  | 0.607945  |
| H | 2.745035  | 2.090541  | -0.582685 |
| H | -1.863379 | 2.719596  | 0.194478  |
| H | 0.495051  | 2.975677  | -0.342602 |
| C | 2.406107  | 1.094088  | -0.320835 |
| C | 1.527089  | -1.453049 | 0.355337  |
| H | -0.965489 | -1.261486 | 1.484915  |
| H | -2.28927  | 0.611351  | 1.584414  |
| C | 2.87267   | -1.239637 | 0.063578  |
| C | 3.310485  | 0.038543  | -0.277708 |
| H | 1.178496  | -2.445749 | 0.61735   |
| H | 3.5725    | -2.065926 | 0.102427  |
| H | 4.355455  | 0.212609  | -0.507232 |
| O | -2.754087 | -1.199084 | -0.449295 |
| O | -2.790299 | 0.239682  | -0.395631 |
| O | -1.340057 | -1.446734 | -0.539198 |

---

In4-M

---

|   |           |           |           |
|---|-----------|-----------|-----------|
| C | 3.396803  | 1.207322  | -0.123146 |
| C | 2.205036  | 1.545032  | 0.509061  |
| C | 1.177517  | 0.605443  | 0.644002  |
| C | 1.35815   | -0.688604 | 0.129992  |
| C | 2.556758  | -1.021891 | -0.494854 |
| C | 3.575933  | -0.080295 | -0.624848 |
| H | 4.182706  | 1.945885  | -0.227506 |
| H | 2.058685  | 2.547076  | 0.897042  |
| H | 2.691     | -2.021403 | -0.893971 |
| H | 4.501463  | -0.349554 | -1.119145 |
| C | 0.253732  | -1.711466 | 0.195643  |
| H | 0.662837  | -2.693225 | 0.439696  |
| C | -0.06682  | 0.950559  | 1.325162  |
| H | -0.184458 | 1.974471  | 1.66063   |
| C | -0.945215 | -1.375126 | 1.131448  |
| H | -0.983312 | -2.055016 | 1.986641  |
| C | -1.031623 | 0.05429   | 1.571784  |
| H | -1.930564 | 0.332285  | 2.107623  |
| O | -1.672973 | -1.279846 | -0.959581 |
| O | -2.081671 | -1.748468 | 0.33279   |
| O | -0.377698 | -1.902838 | -1.100993 |
| O | -2.293536 | 1.578033  | -1.063274 |
| O | -3.048544 | 1.484862  | -0.059276 |
| O | -1.266829 | 2.299917  | -0.951527 |

---

TS2-M

---

|   |           |           |           |
|---|-----------|-----------|-----------|
| C | 3.377346  | 0.833408  | -0.201506 |
| C | 2.232108  | 1.39454   | 0.341392  |
| C | 1.09052   | 0.610495  | 0.571542  |
| C | 1.120093  | -0.757506 | 0.258148  |
| C | 2.276145  | -1.313501 | -0.285591 |
| C | 3.39834   | -0.525629 | -0.521517 |
| H | 4.250544  | 1.44849   | -0.383195 |
| H | 2.195279  | 2.453861  | 0.568677  |
| H | 2.294167  | -2.369248 | -0.529586 |
| H | 4.288986  | -0.971076 | -0.948141 |
| C | -0.047841 | -1.667351 | 0.556063  |
| H | 0.258182  | -2.426535 | 1.279066  |
| C | -0.118893 | 1.222149  | 1.087516  |
| H | -0.039082 | 2.208395  | 1.524452  |
| C | -1.36596  | -0.974283 | 1.029685  |
| H | -1.686918 | -1.395432 | 1.985811  |



|       |           |           |           |        |           |           |           |
|-------|-----------|-----------|-----------|--------|-----------|-----------|-----------|
| O     | 3.176329  | -0.652487 | -1.246028 | H      | 0.926005  | -2.210513 | 0.290477  |
| <hr/> |           |           |           | O      | -2.698124 | -1.490304 | -0.087064 |
| <hr/> |           |           |           | O      | -3.601535 | -0.495432 | 0.103428  |
| TS4-M | <hr/>     |           |           | O      | 2.698121  | -1.490205 | 0.087093  |
| C     | -0.716264 | 2.918374  | -0.264263 | O      | 3.601405  | -0.495207 | -0.103341 |
| C     | 0.220004  | 1.926692  | -0.519766 | <hr/>  |           |           |           |
| C     | -0.149619 | 0.577159  | -0.504269 | Int8-M | <hr/>     |           |           |
| C     | -1.490101 | 0.225568  | -0.197182 | C      | -0.932232 | 2.412355  | 0.015074  |
| C     | -2.42214  | 1.248708  | 0.068971  | C      | -1.62114  | 1.200205  | 0.009615  |
| C     | -2.039529 | 2.577473  | 0.031702  | C      | -0.92544  | -0.010412 | 0.139918  |
| H     | -0.415321 | 3.958352  | -0.288847 | C      | 0.501332  | 0.020408  | 0.332842  |
| H     | 1.247855  | 2.189872  | -0.728766 | C      | 1.165822  | 1.260161  | 0.326373  |
| H     | -3.444394 | 0.978979  | 0.299142  | C      | 0.447142  | 2.442782  | 0.172784  |
| H     | -2.768677 | 3.351991  | 0.234528  | H      | -1.486158 | 3.334206  | -0.114752 |
| C     | -1.895821 | -1.153177 | -0.138668 | H      | -2.691501 | 1.16426   | -0.11621  |
| H     | -1.260886 | -1.997907 | -0.385723 | H      | 2.233846  | 1.27176   | 0.469781  |
| C     | 0.869685  | -0.459776 | -0.749711 | H      | 0.976991  | 3.387253  | 0.173253  |
| H     | 0.556423  | -1.422902 | -1.138996 | C      | 1.178779  | -1.198914 | 0.664967  |
| C     | 1.716662  | 0.111722  | 1.704187  | H      | 0.620717  | -2.071407 | 0.98544   |
| H     | 0.835362  | 0.181912  | 2.378091  | C      | -1.580577 | -1.276107 | -0.043465 |
| C     | 1.700031  | -1.112401 | 0.791572  | H      | -1.020845 | -2.166137 | -0.304822 |
| H     | 0.932787  | -1.855741 | 1.070146  | O      | 2.426816  | -1.456833 | 0.694381  |
| O     | -3.074205 | -1.452712 | 0.229524  | O      | 3.347446  | -0.518892 | 0.289302  |
| O     | 2.584979  | 0.939181  | 1.703648  | O      | -2.827885 | -1.547822 | 0.007491  |
| O     | -3.416984 | -2.765896 | 0.271816  | O      | -3.750323 | -0.599228 | 0.311283  |
| O     | 2.828765  | -1.564835 | 0.37076   | O      | 1.962713  | -0.025745 | -2.026082 |
| O     | 1.997652  | -0.01758  | -1.351245 | H      | 2.801747  | -0.23156  | -1.554137 |
| O     | 2.847284  | -1.034282 | -1.484689 | <hr/>  |           |           |           |
| <hr/> |           |           |           | Int7-M | <hr/>     |           |           |
| C     | 0.694504  | 2.398924  | -0.002829 | C      | 2.438057  | -1.241446 | 0.026883  |
| C     | 1.400618  | 1.199392  | 0.000185  | C      | 1.107204  | -1.612997 | 0.025841  |
| C     | 0.7232    | -0.033278 | 0.010887  | C      | 0.091154  | -0.635742 | 0.013837  |
| C     | -0.723224 | -0.03327  | -0.010883 | C      | 0.440205  | 0.745184  | -0.000231 |
| C     | -1.400608 | 1.199423  | -0.000188 | C      | 1.804905  | 1.092978  | -0.001066 |
| C     | -0.694461 | 2.398938  | 0.00282   | C      | 2.784542  | 0.116714  | 0.012576  |
| H     | 1.242524  | 3.333643  | -0.003622 | H      | 0.826698  | -2.658145 | 0.031173  |
| H     | 2.478396  | 1.179521  | 0.003898  | H      | 2.077886  | 2.139374  | -0.019449 |
| H     | -2.478384 | 1.179585  | -0.003906 | H      | 3.827928  | 0.407507  | 0.005557  |
| H     | -1.242458 | 3.333671  | 0.003607  | H      | 3.210458  | -2.000396 | 0.032407  |
| C     | -1.437924 | -1.272477 | -0.12074  | C      | -0.568521 | 1.776221  | -0.00095  |
| H     | -0.925986 | -2.210496 | -0.290488 | H      | -1.64103  | 1.612966  | -0.059959 |
| C     | 1.437909  | -1.272473 | 0.120741  | C      | -1.289924 | -1.028785 | 0.025582  |
| <hr/> |           |           |           | TS5-M  | <hr/>     |           |           |

|   |           |           |           |   |           |           |           |
|---|-----------|-----------|-----------|---|-----------|-----------|-----------|
| H | -2.347744 | -0.286519 | -0.05062  | O | 2.337604  | -3.539245 | 0.055352  |
| O | -0.181725 | 2.985877  | 0.082677  | O | -2.74222  | -0.014503 | 0.123435  |
| O | -1.624762 | -2.237562 | 0.115979  | O | -3.130366 | 1.275941  | 0.306997  |
| O | -3.483037 | 0.08325   | -0.068605 | O | -3.706194 | -2.358658 | 0.026266  |
| H | -3.993183 | -0.745801 | -0.085048 | H | -4.442068 | -1.93229  | -0.449387 |
| O | -2.939149 | -2.633499 | 0.118046  |   |           |           |           |
| O | -1.110228 | 3.969868  | 0.093343  |   |           |           |           |

---

| Int9-M |           |           |           |
|--------|-----------|-----------|-----------|
| C      | 0.07731   | 2.64129   | -0.000353 |
| C      | 1.041812  | 1.643473  | -0.001517 |
| C      | 0.661199  | 0.293669  | -0.001374 |
| C      | -0.724181 | -0.058351 | -0.000796 |
| C      | -1.682129 | 0.975523  | 0.000463  |
| C      | -1.276593 | 2.304662  | 0.000651  |
| H      | 2.095202  | 1.891869  | -0.00247  |
| H      | -2.723911 | 0.698474  | 0.001189  |
| H      | -2.027832 | 3.085198  | 0.0015    |
| H      | 0.382238  | 3.68107   | -0.000325 |
| C      | -1.059823 | -1.455222 | -0.001495 |
| H      | -0.274052 | -2.2032   | -0.003295 |
| C      | 1.664569  | -0.745446 | -0.00353  |
| O      | -2.212246 | -2.000807 | -0.000509 |
| O      | 2.873013  | -0.488454 | 0.005701  |
| O      | 3.980356  | -1.287157 | -0.001159 |
| O      | -3.351126 | -1.262661 | 0.001745  |

---

| TS6-M |           |           |           |
|-------|-----------|-----------|-----------|
| C     | 2.442359  | -1.23671  | -0.036367 |
| C     | 1.111756  | -1.624371 | -0.014443 |
| C     | 0.094696  | -0.655234 | 0.037272  |
| C     | 0.442143  | 0.720107  | 0.058107  |
| C     | 1.798528  | 1.09107   | 0.034605  |
| C     | 2.785256  | 0.120502  | -0.010756 |
| H     | 0.841834  | -2.672263 | -0.034811 |
| H     | 2.057092  | 2.141673  | 0.047329  |
| H     | 3.827396  | 0.414947  | -0.030556 |
| H     | 3.2193    | -1.990474 | -0.074728 |
| C     | -0.597744 | 1.719187  | 0.089849  |
| H     | -1.872193 | 1.546249  | -0.121996 |
| C     | -1.30381  | -1.023722 | 0.053272  |
| O     | -0.302972 | 2.925575  | 0.284422  |
| O     | -1.647264 | -2.201542 | 0.21635   |
| O     | -2.987921 | 1.910527  | -0.338728 |
| H     | -2.923333 | 2.876956  | -0.205668 |
| O     | -2.854059 | -2.813238 | 0.177377  |
| O     | -1.246912 | 3.927505  | 0.226691  |

---

| Int10-M |           |           |           |
|---------|-----------|-----------|-----------|
| C       | 0.769842  | 2.644617  | 0.024913  |
| C       | -0.405289 | 1.902863  | 0.059999  |
| C       | -0.355212 | 0.495915  | 0.01811   |
| C       | 0.922831  | -0.143189 | -0.038091 |
| C       | 2.092432  | 0.628814  | -0.074391 |
| C       | 2.012899  | 2.014866  | -0.044361 |
| H       | 0.713267  | 3.726057  | 0.046835  |
| H       | -1.372923 | 2.375513  | 0.113442  |
| H       | 3.051743  | 0.130629  | -0.127792 |
| H       | 2.921663  | 2.603844  | -0.07629  |
| C       | 1.000106  | -1.58291  | -0.05864  |
| C       | -1.516418 | -0.346446 | 0.00786   |
| H       | -1.425099 | -1.419834 | -0.119805 |
| O       | 2.055681  | -2.200707 | 0.109045  |

---

| Int11-M |           |           |           |
|---------|-----------|-----------|-----------|
| C       | 0.70003   | 2.674954  | -0.026211 |
| C       | 1.402245  | 1.481302  | 0.020855  |
| C       | 0.70738   | 0.25992   | 0.06849   |
| C       | -0.70745  | 0.259797  | 0.068404  |
| C       | -1.402531 | 1.481053  | 0.020691  |
| C       | -0.700524 | 2.67483   | -0.02629  |
| H       | 1.240148  | 3.613383  | -0.063138 |
| H       | 2.484548  | 1.473005  | 0.023486  |
| H       | -2.484832 | 1.472563  | 0.023196  |
| H       | -1.240805 | 3.613162  | -0.063276 |
| C       | -1.40108  | -1.003978 | 0.16492   |
| C       | 1.401209  | -1.003744 | 0.165068  |
| O       | -2.58749  | -1.093348 | -0.184696 |
| O       | -3.511463 | -2.067664 | 0.019723  |

|   |          |           |           |
|---|----------|-----------|-----------|
| O | 2.58772  | -1.092885 | -0.184275 |
| O | 3.511815 | -2.067061 | 0.020275  |

---

| Int12-M |           |           |           |
|---------|-----------|-----------|-----------|
| C       | -3.147984 | 0.007109  | 0.050272  |
| C       | -2.153133 | 0.981153  | 0.024198  |
| C       | -0.807107 | 0.612949  | -0.00036  |
| C       | -0.459022 | -0.750103 | -0.011254 |
| C       | -1.463108 | -1.719    | 0.022423  |
| C       | -2.803125 | -1.341577 | 0.057313  |
| H       | -4.189554 | 0.303313  | 0.07032   |
| H       | -2.410426 | 2.032827  | 0.039896  |
| H       | -1.185204 | -2.765237 | 0.000157  |
| H       | -3.574935 | -2.101111 | 0.077871  |
| C       | 0.937619  | -1.232672 | -0.13347  |
| C       | 0.192464  | 1.703211  | 0.085765  |
| O       | 1.352496  | -2.258901 | 0.460657  |
| O       | 0.008345  | 2.834579  | -0.434618 |
| O       | 1.259059  | 1.638517  | 0.74201   |
| O       | 1.801166  | -0.714007 | -0.882262 |

---

| Int13-M |           |           |           |
|---------|-----------|-----------|-----------|
| C       | 2.658739  | -1.447883 | 0.096351  |
| C       | 1.301844  | -1.743279 | 0.003259  |
| C       | 0.35427   | -0.721838 | -0.039217 |
| C       | 0.78568   | 0.615816  | -0.012915 |
| C       | 2.15046   | 0.906826  | 0.088719  |
| C       | 3.083859  | -0.12183  | 0.146605  |
| H       | 3.382523  | -2.253278 | 0.13406   |
| H       | 0.95336   | -2.767676 | -0.028868 |
| H       | 2.468562  | 1.941935  | 0.106215  |
| H       | 4.139096  | 0.11176   | 0.222046  |
| C       | -0.126142 | 1.775677  | -0.175874 |
| C       | -1.087456 | -1.125749 | -0.070262 |
| O       | -0.147567 | 2.735567  | 0.631913  |
| O       | -1.477357 | -2.180507 | -0.50942  |
| O       | -0.856563 | 1.94421   | -1.182658 |
| O       | -1.86934  | -0.193706 | 0.48458   |
| C       | -3.292188 | -0.43722  | 0.44479   |
| H       | -3.743452 | 0.426228  | 0.925397  |
| H       | -3.624111 | -0.523017 | -0.589642 |
| H       | -3.52917  | -1.354037 | 0.984226  |

---

| TS7-M |    |           |           |
|-------|----|-----------|-----------|
| C     | -1 | -0.70771  | -1.210487 |
| C     | 0  | -1.391128 | -0.000565 |
| C     | 0  | -0.701378 | 1.216293  |
| C     | 0  | 0.720152  | 1.223811  |
| C     | 0  | 1.394262  | -0.017549 |
| C     | -1 | 0.69152   | -1.210487 |
| H     | 0  | -1.255724 | -2.143901 |
| H     | 0  | -2.473341 | 0.015043  |
| H     | 0  | 2.475745  | -0.025435 |
| H     | 0  | 1.232346  | -2.149049 |
| C     | 0  | 1.521292  | 2.40538   |
| C     | 0  | -1.510822 | 2.425119  |
| O     | 0  | 2.798138  | 2.427981  |
| O     | 0  | -2.684252 | 2.544816  |
| O     | 0  | -1.183609 | 3.424649  |
| O     | 0  | 1.162061  | 3.547075  |
| C     | 0  | 1.19013   | 5.053974  |
| H     | 0  | 0.249155  | 5.487489  |
| H     | 0  | 1.214186  | 4.585401  |
| H     | 0  | 2.100468  | 5.519526  |

---

| Int14-M |           |           |           |
|---------|-----------|-----------|-----------|
| C       | -0.67565  | 0.015928  | 0.11391   |
| C       | -1.498388 | 0.911898  | -0.563067 |
| C       | -0.949918 | 1.94052   | -1.326777 |
| C       | 0.447922  | 2.046294  | -1.431656 |
| C       | 1.270073  | 1.147453  | -0.743631 |
| C       | 0.709765  | 0.137872  | 0.030887  |
| H       | -1.117114 | -0.77203  | 0.712478  |
| H       | -2.5765   | 0.837848  | -0.499283 |
| H       | 2.345087  | 1.241211  | -0.834735 |
| H       | 1.352698  | -0.553857 | 0.561642  |
| C       | 1.128932  | 3.018303  | -2.320344 |
| C       | -1.901782 | 2.911727  | -1.954585 |
| O       | 2.100906  | 3.715345  | -1.933205 |
| O       | -3.021662 | 2.621116  | -2.302604 |
| O       | 0.877656  | 3.147113  | -3.542351 |
| C       | 1.027628  | 6.818689  | -3.151657 |
| H       | 0.815752  | 7.819656  | -3.500819 |
| H       | 1.34034   | 6.656459  | -2.130149 |

|   |           |          |           |
|---|-----------|----------|-----------|
| H | 1.012817  | 5.985258 | -3.839216 |
| O | -1.369314 | 4.133887 | -2.030798 |
| C | -2.167658 | 5.152486 | -2.672298 |
| H | -1.540792 | 6.040263 | -2.677737 |
| H | -2.411932 | 4.844252 | -3.688727 |
| H | -3.084681 | 5.316366 | -2.1063   |

---

| TS8-M |           |           |           |
|-------|-----------|-----------|-----------|
| C     | -0.699075 | 0         | 0         |
| C     | -1.392754 | -1.196048 | -0.007343 |
| C     | -0.712101 | -2.437902 | 0.010977  |
| C     | 0.707072  | -2.429464 | 0.070926  |
| C     | 1.383934  | -1.210469 | 0.029558  |
| C     | 0.699075  | 0         | 0         |
| H     | -1.245154 | 0.936044  | -0.018924 |
| H     | -2.474008 | -1.197985 | -0.068133 |
| H     | 2.466354  | -1.231306 | 0.043723  |
| H     | 1.249023  | 0.933031  | -0.017464 |
| C     | 1.571348  | -3.631765 | 0.234658  |
| C     | -1.52145  | -3.610119 | -0.177595 |
| O     | 2.664282  | -3.750019 | -0.269554 |
| O     | -2.80961  | -3.609342 | 0.05815   |
| O     | -1.173086 | -4.753446 | -0.635969 |
| C     | -1.374244 | -6.273317 | 0.506484  |
| H     | -1.210022 | -5.844534 | 1.484805  |
| H     | -2.384269 | -6.561328 | 0.253827  |
| H     | -0.577363 | -6.871091 | 0.088782  |
| O     | 1.04776   | -4.536726 | 1.084528  |
| C     | 1.866258  | -5.697907 | 1.32706   |
| H     | 1.302568  | -6.312482 | 2.024483  |

|   |          |           |          |
|---|----------|-----------|----------|
| H | 2.047939 | -6.234558 | 0.395578 |
| H | 2.821025 | -5.401348 | 1.761449 |

---

| Pro-M |           |           |           |
|-------|-----------|-----------|-----------|
| C     | -3.2031   | -0.704963 | 0.066282  |
| C     | -1.986185 | -1.366132 | 0.200446  |
| C     | -0.784741 | -0.662313 | 0.113924  |
| C     | -0.80912  | 0.728871  | -0.074642 |
| C     | -2.034438 | 1.382076  | -0.222073 |
| C     | -3.227111 | 0.670262  | -0.155012 |
| H     | -4.128606 | -1.264793 | 0.127739  |
| H     | -1.953974 | -2.436437 | 0.360863  |
| H     | -2.033411 | 2.453756  | -0.376293 |
| H     | -4.17248  | 1.187761  | -0.266521 |
| C     | 0.416228  | 1.578997  | -0.064725 |
| C     | 0.475238  | -1.466923 | 0.177982  |
| O     | 0.551111  | 2.59862   | -0.700909 |
| O     | 0.693189  | -2.324154 | 0.997208  |
| O     | 1.303127  | -1.170894 | -0.842506 |
| C     | 2.550208  | -1.889838 | -0.856717 |
| H     | 3.075338  | -1.541382 | -1.742791 |
| H     | 3.121532  | -1.668808 | 0.046169  |
| H     | 2.370293  | -2.963517 | -0.911993 |
| O     | 1.341427  | 1.110803  | 0.794675  |
| C     | 2.591915  | 1.815516  | 0.821914  |
| H     | 3.197535  | 1.301814  | 1.564806  |
| H     | 3.0672    | 1.774857  | -0.159457 |
| H     | 2.436901  | 2.857763  | 1.10352   |

## References:

- [1] H. Bader, *Ozone Sci. Eng.* **2008**, *4*, 169-176.
- [2] E. J. de Melo, J. P. de Mesquita, M. C. Pereira, L. C. Duarte Cavalcante, E. d. Santos Filho, J. Domingos Fabris, J. D. Ardisson, L. C. Alves de Oliveira, *Hyperfine Interact* **2017**, *238*, 52.
- [3] C. F. Chiou, B. J. Mariñas, J. Q. Adams, *Ozone Sci. Eng.* **1995**, *17*, 329-344.
- [4] J. Zhou, Q. Wang, J. K. Cheng, W. Shen, R. N. Zare, X. Y. Sun, *J. Am. Chem. Soc.* **2025**, *147*, 10916-10924.
- [5] Y. Meng, E. Gnanamani, R. N. Zare, *J. Am. Chem. Soc.* **2025**, *147*, 23399-23404.
- [4] Frisch, M. J., Trucks, G. W., Schlegel, H. B. et al. GAUSSIAN 03, Gaussian, Inc., Pittsburgh, PA, **2009**.
